# Supplementary material
Source: PubMed Central journal article supplement (PMC3524331)

## Supplemental Information

**Supplemental Figure 1: Linearity of Complex IV In-Gel Activity Assay.** Panel A shows a BN-PAGE gel of porcine heart mitochondria with increasing protein concentrations from 2.5 to 75 mg; the arrow marks the location of Complex IV. Panel B shows the development of Complex IV activity (for this gel) at 15, 30, 45 and 60 min. The corresponding plot of Complex IV activity versus protein concentration at 30 min is provided in Panel C. Complex IV activity for 10, 25 and 50 mg of protein at 15, 30, 45, and 60 min is shown in Panel D. The slopes of the 10, 25, and 50 mg lines are 21.13, 58.54, and 104.74, respectively.

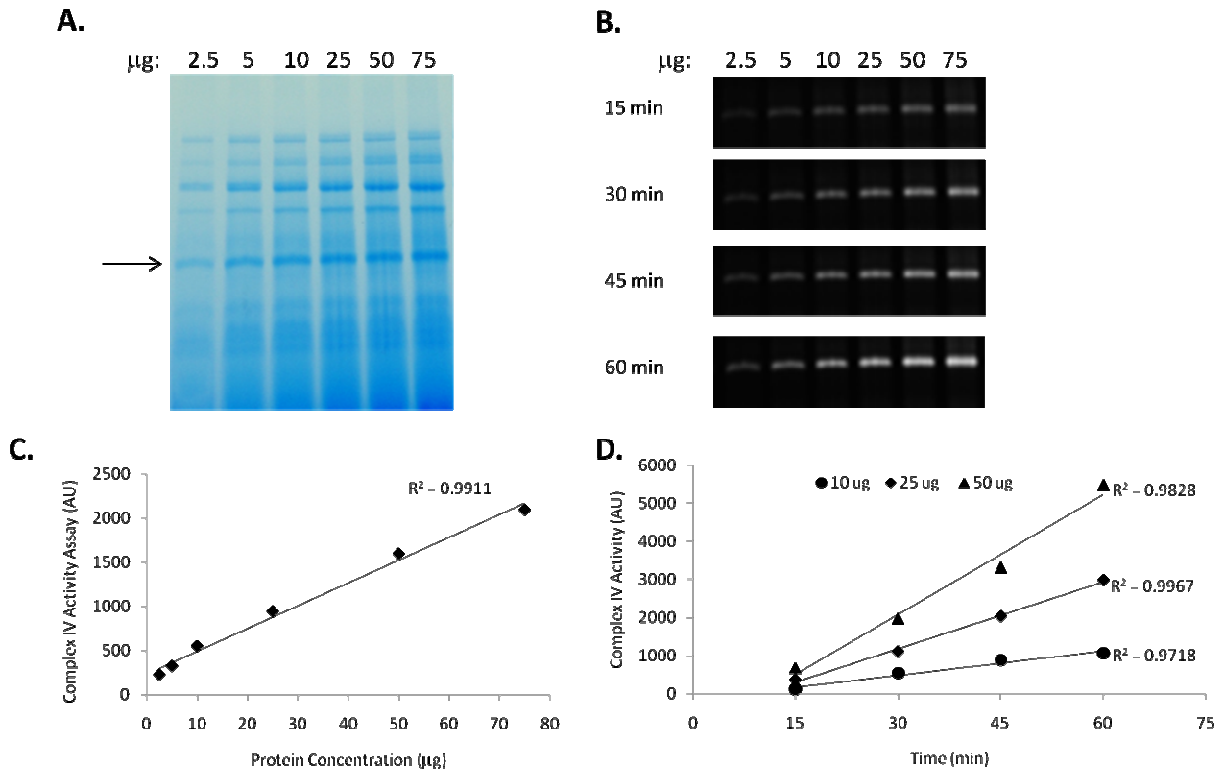

**Supplemental Figure 2:** 1D BN PAGE of porcine heart mitochondria. Mass spectrometry protein identifications for pig blue native gel bands (B1-B5) are provided in supplemental Table 1.

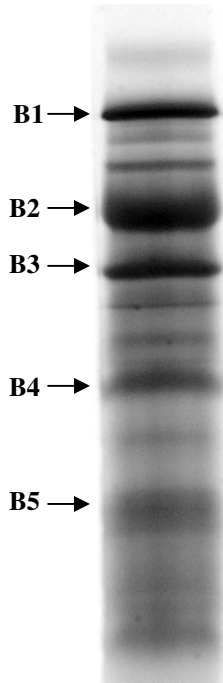

**Supplemental Table 1 (Corresponds to Supplemental Figure 1).**

| <b>Supplemental Table 1: Mass spectrometry identifications for pig 1D BN-PAGE.</b> |                  |
|------------------------------------------------------------------------------------|------------------|
|                                                                                    | Accession Number |
| <i>Complex I (B1)</i>                                                              |                  |
| NADH dehydrogenase [ubiquinone] 1 alpha subcomplex subunit 2                       | Q02370           |
| NADH dehydrogenase [ubiquinone] 1 alpha subcomplex subunit 3                       | Q02371           |
| NADH dehydrogenase [ubiquinone] 1 alpha subcomplex subunit 4                       | O00483           |
| NADH dehydrogenase [ubiquinone] 1 alpha subcomplex subunit 5                       | P23935           |
| NADH dehydrogenase [ubiquinone] 1 alpha subcomplex subunit 6                       | Q02366           |
| NADH dehydrogenase [ubiquinone] 1 alpha subcomplex subunit 7                       | Q05752           |
| NADH dehydrogenase [ubiquinone] 1 alpha subcomplex subunit 8                       | P42029           |
| NADH dehydrogenase [ubiquinone] 1 alpha subcomplex subunit 9                       | P34943           |
| NADH dehydrogenase [ubiquinone] 1 alpha subcomplex subunit 10                      | P34942           |
| NADH dehydrogenase [ubiquinone] 1 alpha subcomplex subunit 11                      | Q8HXG6           |
| NADH dehydrogenase [ubiquinone] 1 alpha subcomplex subunit 12                      | O97725           |
| NADH dehydrogenase [ubiquinone] 1 alpha subcomplex subunit 13                      | Q9P0J0           |
| NADH dehydrogenase [ubiquinone] 1 beta subcomplex subunit 2                        | Q02374           |

|                                                                    |        |
|--------------------------------------------------------------------|--------|
| NADH dehydrogenase<br>[ubiquinone] 1 beta<br>subcomplex subunit 3  | Q02365 |
| NADH dehydrogenase<br>[ubiquinone] 1 beta<br>subcomplex subunit 4  | O95168 |
| NADH dehydrogenase<br>[ubiquinone] 1 beta<br>subcomplex subunit 5  | Q02380 |
| NADH dehydrogenase<br>[ubiquinone] 1 beta<br>subcomplex subunit 6  | Q29259 |
| NADH dehydrogenase<br>[ubiquinone] 1 beta<br>subcomplex subunit 7  | Q02368 |
| NADH dehydrogenase<br>[ubiquinone] 1 beta<br>subcomplex subunit 8  | O95169 |
| NADH dehydrogenase<br>[ubiquinone] 1 beta<br>subcomplex subunit 9  | Q02369 |
| NADH dehydrogenase<br>[ubiquinone] 1 beta<br>subcomplex subunit 10 | Q02373 |
| NADH dehydrogenase<br>[ubiquinone] 1 subunit C2                    | O95298 |
| NADH-ubiquinone<br>oxidoreductase 75 kDa<br>subunit                | P15690 |
| NADH dehydrogenase<br>[ubiquinone] iron-sulfur<br>protein 2        | P17694 |
| NADH dehydrogenase<br>[ubiquinone] iron-sulfur<br>protein 3        | P23709 |
| NADH dehydrogenase<br>[ubiquinone] iron-sulfur<br>protein 3        | O75489 |
| NADH dehydrogenase<br>[ubiquinone] iron-sulfur<br>protein 4        | Q02375 |
| NADH dehydrogenase<br>[ubiquinone] iron-sulfur<br>protein 5        | Q02379 |
| NADH dehydrogenase<br>[ubiquinone] iron-sulfur<br>protein 6        | P23934 |
| NADH dehydrogenase<br>[ubiquinone] iron-sulfur<br>protein 7        | O75251 |
| NADH dehydrogenase<br>[ubiquinone] iron-sulfur<br>protein 8        | P42028 |
| NADH dehydrogenase<br>[ubiquinone] flavoprotein 1                  | P25708 |

|                                                |        |
|------------------------------------------------|--------|
| NADH dehydrogenase [ubiquinone] flavoprotein 2 | P04394 |
| NADH dehydrogenase [ubiquinone] flavoprotein 3 | P56181 |
| NADH-ubiquinone oxidoreductase chain 1         | O79874 |
| NADH-ubiquinone oxidoreductase chain 2         | O79875 |
| NADH-ubiquinone oxidoreductase chain 3         | O79880 |
| NADH-ubiquinone oxidoreductase chain 4         | O79881 |
| NADH-ubiquinone oxidoreductase chain 5         | Q9TDR1 |
|                                                |        |
| <i>Complex V (B2)</i>                          |        |
| ATP synthase subunit alpha                     | P19483 |
| ATP synthase subunit beta                      | P00829 |
| ATP synthase subunit delta                     | P05630 |
| ATP synthase subunit gamma                     | P05631 |
| ATP synthase subunit b                         | P13619 |
| ATP synthase lipid-binding protein             | P32876 |
| ATP synthase subunit epsilon                   | P05632 |
| ATP synthase subunit d                         | P13620 |
| ATP synthase subunit g                         | Q28852 |
| ATP synthase subunit f                         | Q95339 |
| ATP synthase subunit e                         | Q9MYT8 |
| ATP synthase subunit a                         | Q35915 |
| ATP synthase protein 8                         | Q35914 |
| ATP synthase subunit O                         | Q2EN81 |
| ATP synthase-coupling factor 6                 | P13618 |
|                                                |        |
| <i>Complex III (B3)</i>                        |        |
| Cytochrome b-c1 complex subunit 1              | P31800 |
| Cytochrome b-c1 complex subunit 2              | P23004 |
| Cytochrome b-c1 complex subunit 3              | P24964 |
| Cytochrome b-c1 complex subunit 7              | P00129 |
| Cytochrome b-c1 complex subunit 8              | P13271 |

|                                                                 |        |
|-----------------------------------------------------------------|--------|
| Cytochrome b-c1 complex subunit 9                               | P00130 |
| Cytochrome b-c1 complex subunit 10                              | P07552 |
| Cytochrome b-c1 complex subunit Rieske                          | P13272 |
| Cytochrome c1, heme protein                                     | P00125 |
|                                                                 |        |
| <i>Complex IV (B4)</i>                                          |        |
| Cytochrome c oxidase subunit 1                                  | O79876 |
| Cytochrome c oxidase subunit 2                                  | P50667 |
| Cytochrome c oxidase subunit 3                                  | Q35916 |
| Cytochrome c oxidase subunit 4 isoform 1                        | Q95283 |
| Cytochrome c oxidase subunit 5A                                 | P00426 |
| Cytochrome c oxidase subunit 5B                                 | Q5S3G4 |
| Cytochrome c oxidase subunit 6A2                                | P07471 |
| Cytochrome c oxidase subunit 6B1                                | P00429 |
| Cytochrome c oxidase subunit 6C                                 | A1XQT2 |
| Cytochrome c oxidase subunit 7A1                                | Q8SPJ9 |
| Cytochrome c oxidase subunit 7B                                 | P13183 |
| Cytochrome c oxidase subunit 7C                                 | Q1W0Y2 |
|                                                                 |        |
| <i>Complex II (B5)</i>                                          |        |
| Succinate dehydrogenase [ubiquinone] flavoprotein subunit       | Q0QF01 |
| Succinate dehydrogenase [ubiquinone] iron-sulfur subunit        | Q007T0 |
| Succinate dehydrogenase [ubiquinone] cytochrome b small subunit | Q95123 |

**Supplemental Figure S3:** Demonstration that Abgent's pyruvate dehydrogenase kinase 4 antibody (catalog #AP7041b) primarily detects the  $\alpha$ -subunit of Complex V, not PDK4. As shown in Abgent's product literature, we also observed a specific band at ~50kD (A). However, we became skeptical of this result for several reasons. One, the actual molecular weight of PDK4 is between 43 and 46.5kD, not 50kD. More notably, the PDK4 antibody labeled a portion of the 2D BN-PAGE gel associated with Complex V, not the PDH complex. Initially, we were excited about this result, hypothesizing that PDK4 may be associated with other mitochondrial protein complexes. To test this hypothesis, we performed western blots on mouse heart mitochondria from wild-type and PDK4 knock-out animals (B). As these western blots are identical, this result revealed that the PDK4 antibody was detecting a protein other than PDK4. An additional western blot was performed on purified Complex V (C), which showed that the PDK4 antibody was detecting the Complex V's  $\alpha$ -subunit.





**A.**  
 Abgent's Product Literature

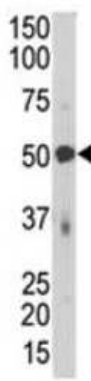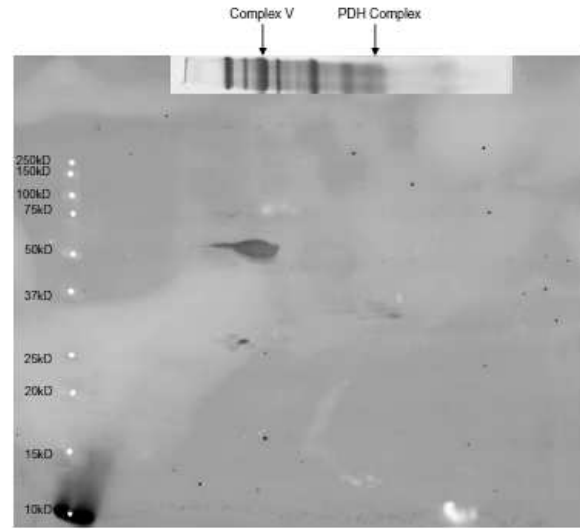

**B.**

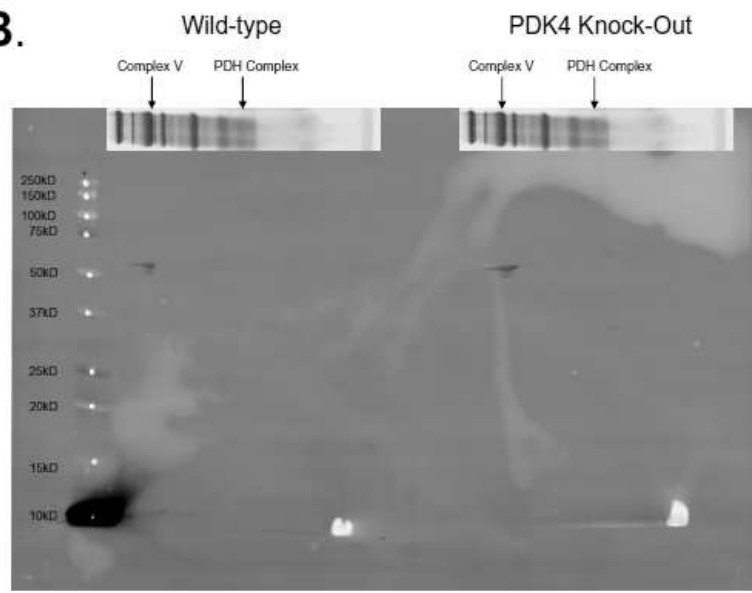

**C.**

PDK4 Western Blot

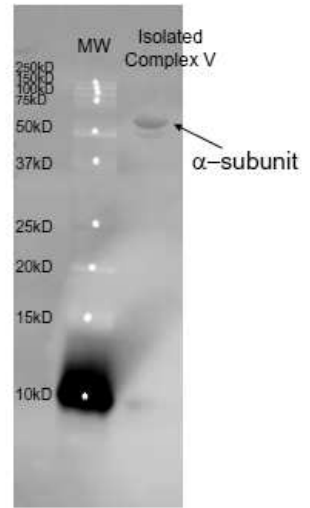

Paired SDS Gel of Complex V

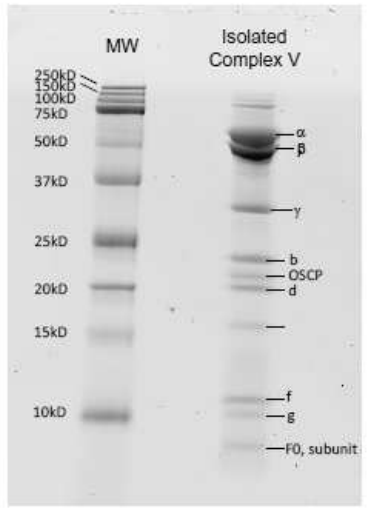

**Supplemental Figure S4:** Western blots, probing for MEK6, PKC $\delta$  and PKC $\epsilon$  on 2D BN-PAGE gels, with 100  $\mu$ g of isolated mitochondria and 0.05  $\mu$ g of purified kinase as controls.

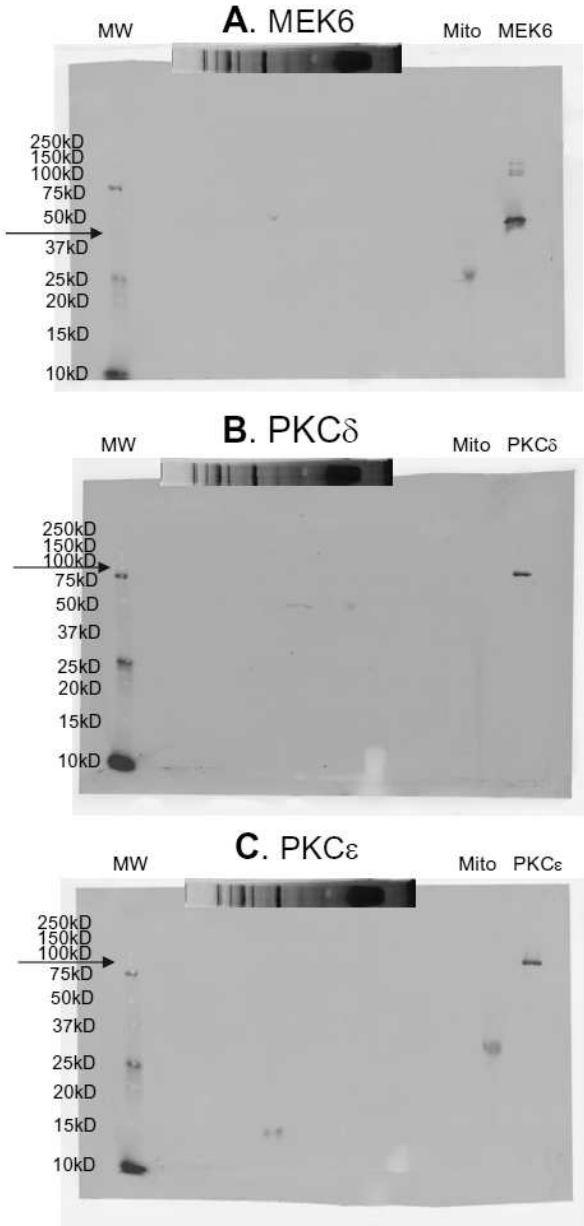

**Supplemental Figure S5.** 2D PAGE of rat heart mitochondrial proteins following incubation of 1D BN-PAGE slices with  $\gamma$ - $^{32}\text{P}$ -ATP. The Coomassie blue stained gel (Panel A) and the  $\gamma$ - $^{32}\text{P}$ -ATP-labeled gel (Panel B) from three different  $\gamma$ - $^{32}\text{P}$ -ATP-labeling experiments are shown. Figure abbreviations correspond to Table SX as follows: CI, 75 kDa, protein #1; Aconitase, protein #4; SC (supercomplex) and CV,  $\alpha$ , protein #6; SC (supercomplex) and CV,  $\beta$ , protein #7; CK, protein #12; CI, 39 kDa, protein #18; CIV, subunit IV, protein #32; CIV, Va, protein #35; CIV, Vb, protein #36; and CIV, VIc, protein #38. All protein assignments were made by direct picks from the Coomassie gels. Overlays were performed using 4 fiduciary markers.

A

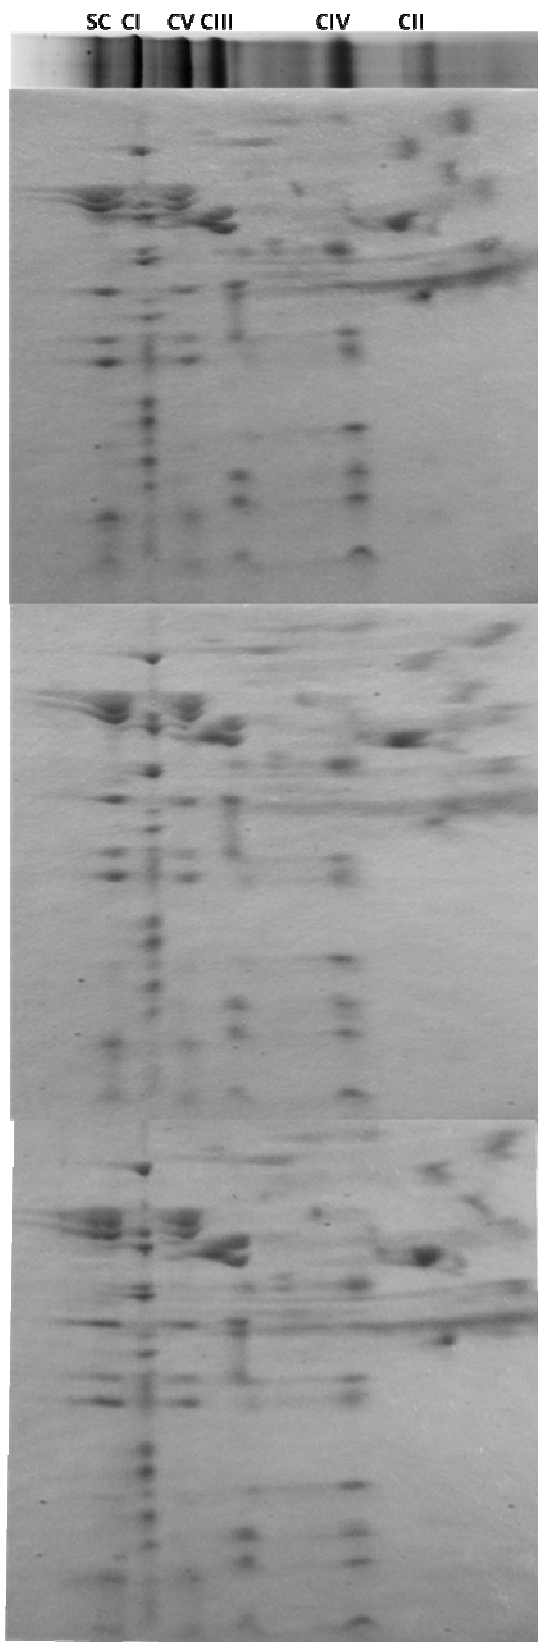

B

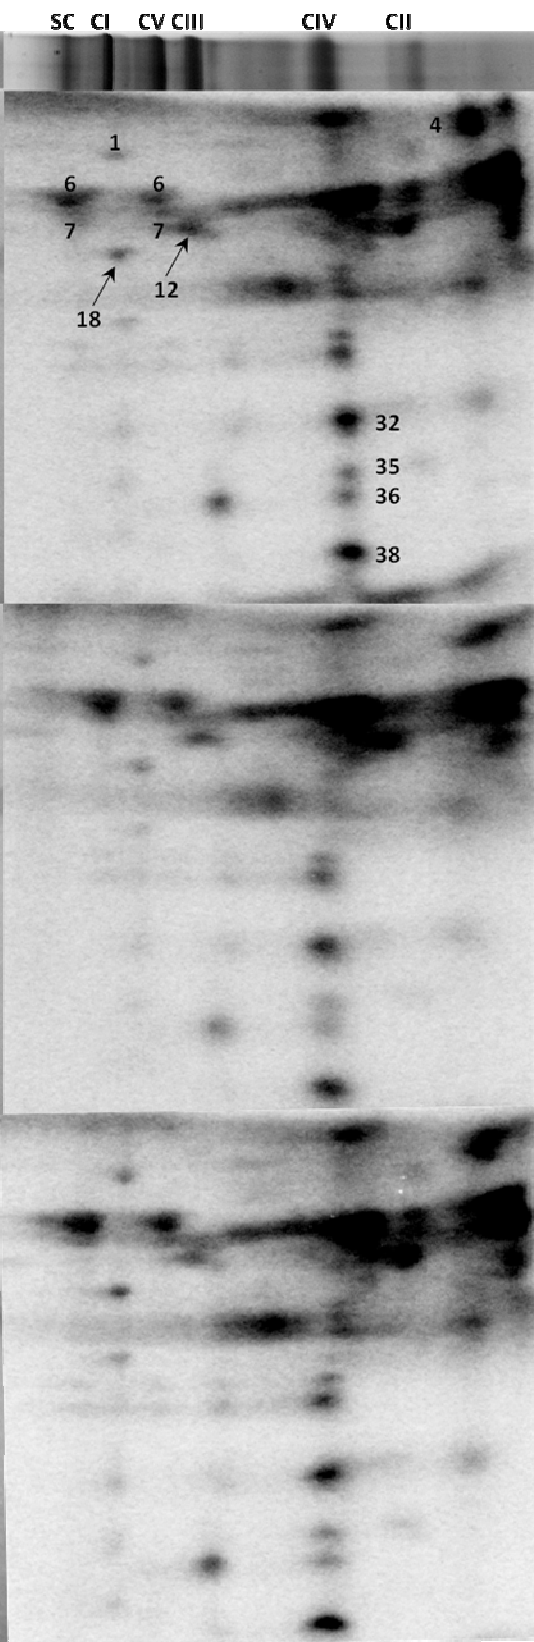

**Supplemental Figure S6:** Mitochondrial complex identifications for 2D BN-PAGE gel. Numbers in panel refer to the individual subunit identifications identified in supplemental Table S2.

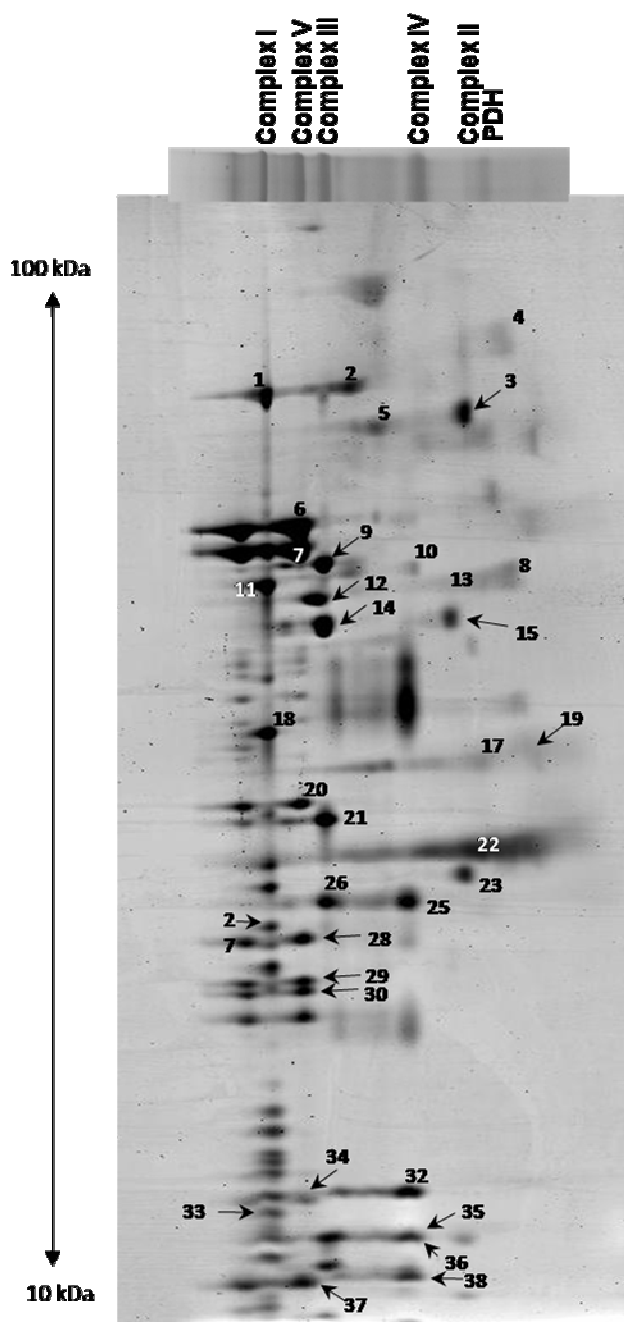

**Supplemental Table S2. 2D BN-PAGE protein identifications (rat), corresponding to Supplemental Figure S6.**

| <b>2D BN-PAGE Spot Number</b> | <b>Protein Annotation</b>                                    | <b>Protein Accession Number</b> |  |
|-------------------------------|--------------------------------------------------------------|---------------------------------|--|
| 1                             | NADH dehydrogenase (ubiquinone) Fe-S protein 1, 75kDa        | Q66HF1                          |  |
| 2                             | Trifunctional enzyme, alpha subunit                          | Q3KR86                          |  |
| 3                             | Complex II, flavoprotein subunit                             | Q920L2                          |  |
| 4                             | Aconitase                                                    | Q9ER34                          |  |
| 5                             | Mitochondrial inner membrane                                 | Q3KR86                          |  |
| 6                             | Complex V, alpha subunit                                     | P15999                          |  |
| 7                             | Complex V, beta subunit                                      | P10719                          |  |
| 8                             | Citrate synthase                                             | Q8VHF5                          |  |
| 9                             | Ubiquinol-cytochrome c reductase core protein 1              | Q68FY0                          |  |
| 10                            | Fumarase                                                     | P14408                          |  |
| 11                            | NADH dehydrogenase (ubiquinone) Fe-S protein 2, 49kDa        | Q641Y2                          |  |
| 12                            | Creatine kinase                                              | P09605                          |  |
| 13                            | Pyruvate dehydrogenase, E1 alpha subunit                     | P26284                          |  |
| 14                            | Ubiquinol-cytochrome c reductase core protein II             | P32551                          |  |
| 15                            | Long-chain specific acyl Coenzyme A dehydrogenase            | P15650                          |  |
| 17                            | VDAC-1                                                       | Q9Z2L0                          |  |
| 18                            | NADH dehydrogenase (ubiquinone) 1 alpha subcomplex, 9, 39kDa | Q5BK63                          |  |
| 19                            | Malate dehydrogenase                                         | P04636                          |  |

|    |                                                       |          |  |
|----|-------------------------------------------------------|----------|--|
| 20 | ATP synthase F1 complex, gamma subunit                | P35435   |  |
| 21 | Ubiquinol-cytochrome c reductase, heme protein        | Q9D0M3   |  |
| 22 | ADP/ATP translocase 1                                 | Q05962   |  |
| 23 | Succinate dehydrogenase complex, subunit B            | P21913   |  |
| 25 | Cytochrome c oxidase subunit II                       | P00406   |  |
| 26 | Ubiquinol-cytochrome c reductase, iron-sulfur subunit | P20788   |  |
| 27 | NADH dehydrogenase (ubiquinone) flavoprotein 2, 24kDa | P19234   |  |
| 28 | Complex V, subunit b                                  | P19511   |  |
| 29 | Complex V, subunit o                                  | Q2EN81   |  |
| 30 | Complex V, subunit d                                  | AAI04565 |  |
| 32 | Cytochrome c oxidase subunit IV                       | P10888   |  |
| 33 | NADH dehydrogenase (ubiquinone) 1 alpha subcomplex,6  | O9CQZ5   |  |
| 34 | Complex V, delta subunit                              | P35434   |  |
| 35 | Cytochrome c oxidase subunit Va                       | P11240   |  |
| 36 | Cytochrome c oxidase subunit Vb                       | P12075   |  |
| 37 | Complex V, ATPase subunit e                           | P29419   |  |
| 38 | Cytochrome c oxidase subunit VIc-2                    | P11951   |  |

**Supplemental Figure S7:** Mass spectrometry protein identifications for rat blue native gel bands (B1-B5) are provided in supplemental Table S3-S9.

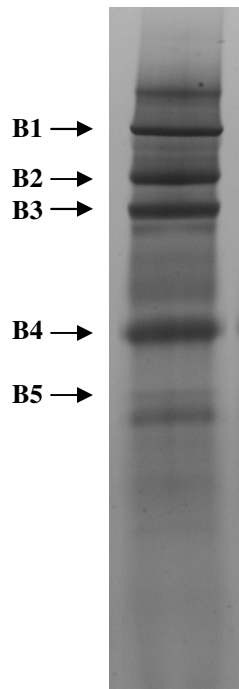



Supplemental Table S3. Complex 1 band chymotrypsin digestion

| Accession | Coverage | Peptides | # AAs | MW [kDa] | calc. pI | Score   | Description                                                           |
|-----------|----------|----------|-------|----------|----------|---------|-----------------------------------------------------------------------|
| QCR2_RAT  | 24.12    | 7        | 452   | 48.4     | 9.14     | 303.85  | (P32551) Cytochrome b-c1 complex subunit 2, mitochondrial             |
| ATPA_RAT  | 29.48    | 18       | 553   | 59.7     | 9.19     | 585.59  | (P15999) ATP synthase subunit alpha, mitochondrial                    |
| ECHA_RAT  | 21.76    | 18       | 763   | 82.6     | 9.06     | 583.92  | (Q64428) Trifunctional enzyme subunit alpha, mitochondrial            |
| KCRS_RAT  | 12.41    | 5        | 419   | 47.4     | 8.51     | 221.36  | (P09605) Creatine kinase S-type, mitochondrial                        |
| COX7B_RAT | 16.25    | 3        | 80    | 9.0      | 10.11    | 87.19   | (P80431) Cytochrome c oxidase subunit 7B, mitochondrial               |
| ECHB_RAT  | 18.32    | 8        | 475   | 51.4     | 9.47     | 268.83  | (Q60587) Trifunctional enzyme subunit beta, mitochondrial             |
| ATPG_RAT  | 25.27    | 12       | 273   | 30.2     | 8.84     | 461.50  | (P35435) ATP synthase subunit gamma, mitochondrial                    |
| PCCA_RAT  | 25.71    | 16       | 704   | 77.7     | 6.77     | 603.20  | (P14882) Propionyl-CoA carboxylase alpha chain, mitochondrial         |
| NDUS1_RAT | 40.99    | 59       | 727   | 79.4     | 5.90     | 2265.32 | (Q66HF1) NADH-ubiquinone oxidoreductase 75 kDa subunit, mitochondrial |
| NDUAA_RAT | 49.86    | 27       | 355   | 40.5     | 7.80     | 886.21  | (Q561S0) NADH dehydrogenase [ubiquinone] 1 alpha                      |

|           |       |    |     |      |       |         |                                                                               |
|-----------|-------|----|-----|------|-------|---------|-------------------------------------------------------------------------------|
|           |       |    |     |      |       |         | subcomplex subunit 10, mitochondrial                                          |
| NDUS2_RAT | 38.01 | 30 | 463 | 52.5 | 6.99  | 913.58  | (Q641Y2) NADH dehydrogenase [ubiquinone] iron-sulfur protein 2, mitochondrial |
| QCR1_RAT  | 21.88 | 6  | 480 | 52.8 | 5.88  | 287.05  | (Q68FY0) Cytochrome b-c1 complex subunit 1, mitochondrial                     |
| PCCB_RAT  | 23.48 | 15 | 541 | 58.6 | 7.47  | 541.41  | (P07633) Propionyl-CoA carboxylase beta chain, mitochondrial                  |
| ATPB_RAT  | 35.54 | 43 | 529 | 56.3 | 5.34  | 1574.01 | (P10719) ATP synthase subunit beta, mitochondrial                             |
| ADT1_RAT  | 14.77 | 7  | 298 | 33.0 | 9.79  | 313.58  | (Q05962) ADP/ATP translocase 1                                                |
| ADT2_RAT  | 11.07 | 2  | 298 | 32.9 | 9.73  | 204.60  | (Q09073) ADP/ATP translocase 2                                                |
| VDAC1_RAT | 34.28 | 8  | 283 | 30.7 | 8.54  | 335.17  | (Q9Z2L0) Voltage-dependent anion-selective channel protein 1                  |
| VDAC2_RAT | 10.85 | 2  | 295 | 31.7 | 7.49  | 122.07  | (P81155) Voltage-dependent anion-selective channel protein 2                  |
| ATP5H_RAT | 68.94 | 12 | 161 | 18.8 | 6.60  | 336.84  | (P31399) ATP synthase subunit d, mitochondrial                                |
| ATPO_RAT  | 33.80 | 5  | 213 | 23.4 | 10.02 | 115.61  | (Q06647) ATP synthase subunit O, mitochondrial                                |
| COX2_RAT  | 26.87 | 6  | 227 | 25.9 | 4.73  | 187.41  | (P00406) Cytochrome c oxidase subunit 2                                       |
| COX41_RAT | 23.67 | 4  | 169 | 19.5 | 9.44  | 105.22  | (P10888) Cytochrome c oxidase subunit 4 isoform 1, mitochondrial              |
| CX6C2_RAT | 43.42 | 4  | 76  | 8.4  | 10.07 | 176.58  | (P11951) Cytochrome c                                                         |

|           |       |    |     |      |       |         |                                                                                      |
|-----------|-------|----|-----|------|-------|---------|--------------------------------------------------------------------------------------|
|           |       |    |     |      |       |         | oxidase subunit 6C-2                                                                 |
| CTRB1_RAT | 3.80  | 3  | 263 | 27.8 | 5.07  | 156.94  | (P07338) Chymotrypsinogen B                                                          |
| CX6A1_RAT | 13.51 | 2  | 111 | 12.3 | 9.32  | 116.80  | (P10818) Cytochrome c oxidase subunit 6A1, mitochondrial                             |
| CX6A2_RAT | 41.49 | 10 | 94  | 10.5 | 9.07  | 396.49  | (P10817) Cytochrome c oxidase subunit 6A2, mitochondrial                             |
| MMSA_RAT  | 5.42  | 2  | 535 | 57.8 | 8.22  | 65.66   | (Q02253) Methylmalonate-semialdehyde dehydrogenase [acylating], mitochondrial        |
| NDUA5_RAT | 11.21 | 6  | 116 | 13.4 | 7.43  | 216.47  | (Q63362) NADH dehydrogenase [ubiquinone] 1 alpha subcomplex subunit 5                |
| NDUA9_RAT | 51.89 | 47 | 370 | 41.8 | 9.76  | 1603.55 | (Q5BK63) NADH dehydrogenase [ubiquinone] 1 alpha subcomplex subunit 9, mitochondrial |
| NDUAB_RAT | 39.01 | 11 | 141 | 14.8 | 8.09  | 305.41  | (Q80W89) NADH dehydrogenase [ubiquinone] 1 alpha subcomplex subunit 11               |
| NDUS4_RAT | 29.14 | 7  | 175 | 19.7 | 10.14 | 284.46  | (Q5XIF3) NADH dehydrogenase [ubiquinone] iron-sulfur protein 4, mitochondrial        |
| NDUV2_RAT | 22.58 | 11 | 248 | 27.4 | 6.68  | 386.71  | (P19234) NADH dehydrogenase [ubiquinone] flavoprotein 2, mitochondrial               |
| NU3M_RAT  | 12.17 | 2  | 115 | 13.1 | 4.44  | 101.86  | (P05506) NADH-ubiquinone oxidoreductase                                              |

|          |       |   |     |      |      |        |                                                                |
|----------|-------|---|-----|------|------|--------|----------------------------------------------------------------|
|          |       |   |     |      |      |        | chain 3                                                        |
| NU5M_RAT | 5.57  | 3 | 610 | 68.9 | 9.26 | 140.29 | (P11661) NADH-ubiquinone oxidoreductase chain 5                |
| THIL_RAT | 13.21 | 3 | 424 | 44.7 | 8.76 | 143.43 | (P17764) Acetyl-CoA acetyltransferase, mitochondrial           |
| UCRI_RAT | 12.41 | 4 | 274 | 29.4 | 8.87 | 166.46 | (P20788) Cytochrome b-c1 complex subunit Rieske, mitochondrial |
|          |       |   |     |      |      |        |                                                                |

Supplemental Table S4. Complex 1 band trypsin digestion

| Accession | Coverage | Peptide | # AAs | MW [kDa] | calc. pI | Score    | Description                                                |
|-----------|----------|---------|-------|----------|----------|----------|------------------------------------------------------------|
| IDHP_RAT  | 18.36    | 8       | 452   | 50.9     | 8.69     | 287.04   | (P56574) Isocitrate dehydrogenase [NADP], mitochondrial    |
| QCR2_RAT  | 44.25    | 48      | 452   | 48.4     | 9.14     | 2136.95  | (P32551) Cytochrome b-c1 complex subunit 2, mitochondrial  |
| ATPA_RAT  | 59.49    | 224     | 553   | 59.7     | 9.19     | 11357.57 | (P15999) ATP synthase subunit alpha, mitochondrial         |
| AATM_RAT  | 44.42    | 19      | 430   | 47.3     | 9.00     | 741.97   | (P00507) Aspartate aminotransferase, mitochondrial         |
| MDHM_RAT  | 42.01    | 24      | 338   | 35.7     | 8.68     | 1243.02  | (P04636) Malate dehydrogenase, mitochondrial               |
| TRY1_RAT  | 8.13     | 8       | 246   | 25.9     | 4.89     | 202.82   | (P00762) RecName: Full=Anionic trypsin-1;                  |
| ECHA_RAT  | 47.71    | 57      | 763   | 82.6     | 9.06     | 2212.11  | (Q64428) Trifunctional enzyme subunit alpha, mitochondrial |
| KCRS_RAT  | 41.29    | 26      | 419   | 47.4     | 8.51     | 1121.96  | (P09605) Creatine kinase S-type, mitochondrial             |
| ECHB_RAT  | 51.16    | 27      | 475   | 51.4     | 9.47     | 999.83   | (Q60587) Trifunctional enzyme subunit beta, mitochondrial  |
| ATPG_RAT  | 30.77    | 20      | 273   | 30.2     | 8.84     | 760.00   | (P35435) ATP synthase subunit gamma, mitochondrial         |

|           |       |     |     |      |      |          |                                                                                                                   |
|-----------|-------|-----|-----|------|------|----------|-------------------------------------------------------------------------------------------------------------------|
| K2C1_RAT  | 3.84  | 2   | 625 | 64.8 | 7.87 | 106.08   | (Q6IMF3) Keratin, type II cytoskeletal 1                                                                          |
| PCCA_RAT  | 52.27 | 172 | 704 | 77.7 | 6.77 | 6828.64  | (P14882) Propionyl-CoA carboxylase alpha chain, mitochondrial                                                     |
| ACON_RAT  | 17.82 | 13  | 780 | 85.4 | 7.83 | 657.80   | (Q9ER34) Aconitate hydratase, mitochondrial                                                                       |
| NDUS1_RAT | 73.73 | 346 | 727 | 79.4 | 5.90 | 14423.08 | (Q66HF1) NADH-ubiquinone oxidoreductase 75 kDa subunit, mitochondrial                                             |
| ODP2_RAT  | 12.50 | 6   | 632 | 67.1 | 8.53 | 233.75   | (P08461) Dihydrolipoyllysine-residue acetyltransferase component of pyruvate dehydrogenase complex, mitochondrial |
| NDUAA_RAT | 69.86 | 152 | 355 | 40.5 | 7.80 | 5483.83  | (Q561S0) NADH dehydrogenase [ubiquinone] 1 alpha subcomplex subunit 10, mitochondrial                             |
| NDUS2_RAT | 74.30 | 253 | 463 | 52.5 | 6.99 | 9935.37  | (Q641Y2) NADH dehydrogenase [ubiquinone] iron-sulfur protein 2, mitochondrial                                     |
| ACSL1_RAT | 8.58  | 4   | 699 | 78.1 | 6.99 | 176.28   | (P18163) Long-chain-fatty-acid--CoA ligase 1                                                                      |
| QCR1_RAT  | 49.17 | 47  | 480 | 52.8 | 5.88 | 1976.07  | (Q68FY0) Cytochrome b-c1 complex subunit 1, mitochondrial                                                         |
| PCCB_RAT  | 52.50 | 163 | 541 | 58.6 | 7.47 | 7867.57  | (P07633) Propionyl-CoA carboxylase beta chain, mitochondrial                                                      |
| FUMH_RAT  | 8.28  | 3   | 507 | 54.4 | 8.95 | 181.68   | (P14408) Fumarate hydratase, mitochondrial                                                                        |

|           |       |     |     |      |      |          |                                                                         |
|-----------|-------|-----|-----|------|------|----------|-------------------------------------------------------------------------|
| PHB2_RAT  | 9.36  | 2   | 299 | 33.3 | 9.83 | 64.67    | (Q5XIH7) Prohibitin-2                                                   |
| COX5A_RAT | 54.11 | 17  | 146 | 16.1 | 6.54 | 643.65   | (P11240) Cytochrome c oxidase subunit 5A, mitochondrial                 |
| ATPB_RAT  | 73.53 | 337 | 529 | 56.3 | 5.34 | 12840.30 | (P10719) ATP synthase subunit beta, mitochondrial                       |
| ADT1_RAT  | 51.68 | 61  | 298 | 33.0 | 9.79 | 2414.02  | (Q05962) ADP/ATP translocase 1                                          |
| ADT2_RAT  | 37.58 | 32  | 298 | 32.9 | 9.73 | 1398.48  | (Q09073) ADP/ATP translocase 2                                          |
| SODM_RAT  | 13.06 | 3   | 222 | 24.7 | 8.81 | 164.74   | (P07895) Superoxide dismutase [Mn], mitochondrial                       |
| VDAC1_RAT | 55.48 | 22  | 283 | 30.7 | 8.54 | 1037.52  | (Q9Z2L0) Voltage-dependent anion-selective channel protein 1            |
| VDAC2_RAT | 52.54 | 14  | 295 | 31.7 | 7.49 | 573.19   | (P81155) Voltage-dependent anion-selective channel protein 2            |
| VDAC3_RAT | 36.40 | 15  | 283 | 30.8 | 8.70 | 483.43   | (Q9R1Z0) Voltage-dependent anion-selective channel protein 3            |
| MPCP_RAT  | 22.75 | 10  | 356 | 39.4 | 9.33 | 437.88   | (P16036) Phosphate carrier protein, mitochondrial                       |
| ACADV_RAT | 15.42 | 7   | 655 | 70.7 | 8.90 | 273.66   | (P45953) Very long-chain specific acyl-CoA dehydrogenase, mitochondrial |
| APBB3_RAT | 1.79  | 4   | 504 | 54.9 | 7.50 | 84.11    | (O35827) Amyloid beta A4 precursor protein-binding family B             |

|             |       |    |     |      |           |         |                                                                  |
|-------------|-------|----|-----|------|-----------|---------|------------------------------------------------------------------|
|             |       |    |     |      |           |         | member 3                                                         |
| AT5F1_RAT   | 45.31 | 27 | 256 | 28.9 | 9.36      | 1117.25 | (P19511) ATP synthase subunit b, mitochondrial                   |
| ATP5H_RAT   | 68.32 | 31 | 161 | 18.8 | 6.60      | 1039.26 | (P31399) ATP synthase subunit d, mitochondrial                   |
| ATP5I_RAT   | 36.62 | 4  | 71  | 8.2  | 9.35      | 165.27  | (P29419) ATP synthase subunit e, mitochondrial                   |
| ATP8_RAT    | 34.33 | 7  | 67  | 7.6  | 9.32      | 228.03  | (P11608) ATP synthase protein 8                                  |
| ATPO_RAT    | 53.52 | 28 | 213 | 23.4 | 10.0<br>2 | 1024.91 | (Q06647) ATP synthase subunit O, mitochondrial                   |
| BR44L_MOUSE | 43.12 | 4  | 109 | 12.4 | 9.61      | 214.21  | (P63030) Brain protein 44-like protein                           |
| COX1_RAT    | 8.95  | 3  | 514 | 56.9 | 6.80      | 69.59   | (P05503) Cytochrome c oxidase subunit 1                          |
| COX2_RAT    | 31.72 | 17 | 227 | 25.9 | 4.73      | 679.05  | (P00406) Cytochrome c oxidase subunit 2                          |
| COX4I_RAT   | 37.87 | 25 | 169 | 19.5 | 9.44      | 725.89  | (P10888) Cytochrome c oxidase subunit 4 isoform 1, mitochondrial |
| COX5B_RAT   | 48.84 | 7  | 129 | 13.9 | 7.78      | 247.27  | (P12075) Cytochrome c oxidase subunit 5B, mitochondrial          |
| CX6C2_RAT   | 31.58 | 8  | 76  | 8.4  | 10.0<br>7 | 280.21  | (P11951) Cytochrome c oxidase subunit 6C-2                       |
| CPT1B_RAT   | 13.60 | 13 | 772 | 88.2 | 8.60      | 347.08  | (Q63704) Carnitine O-palmitoyltransferase 1, muscle isoform      |
| CX7A2_RAT   | 15.66 | 7  | 83  | 9.3  | 10.2<br>7 | 191.46  | (P35171) Cytochrome c oxidase subunit 7A2, mitochondrial         |
| GRP75_RAT   | 10.60 | 6  | 679 | 73.8 | 6.30      | 225.15  | (P48721) Stress-70 protein, mitochondrial                        |



|           |       |     |     |      |       |         |                                                                                      |
|-----------|-------|-----|-----|------|-------|---------|--------------------------------------------------------------------------------------|
| HCD2_RAT  | 22.61 | 3   | 261 | 27.2 | 8.78  | 147.35  | (O70351) 3-hydroxyacyl-CoA dehydrogenase type-2                                      |
| MCCB_RAT  | 17.23 | 6   | 563 | 61.5 | 8.31  | 171.61  | (Q5XIT9) Methylcrotonoyl-CoA carboxylase beta chain, mitochondrial                   |
| MMSA_RAT  | 24.67 | 14  | 535 | 57.8 | 8.22  | 366.51  | (Q02253) Methylmalonate-semialdehyde dehydrogenase [acylating], mitochondrial        |
| NDUA5_RAT | 79.31 | 72  | 116 | 13.4 | 7.43  | 3434.65 | (Q63362) NADH dehydrogenase [ubiquinone] 1 alpha subcomplex subunit 5                |
| NDUA9_RAT | 68.38 | 176 | 370 | 41.8 | 9.76  | 6835.79 | (Q5BK63) NADH dehydrogenase [ubiquinone] 1 alpha subcomplex subunit 9, mitochondrial |
| NDUAB_RAT | 78.72 | 57  | 141 | 14.8 | 8.09  | 2434.31 | (Q80W89) NADH dehydrogenase [ubiquinone] 1 alpha subcomplex subunit 11               |
| NDUS4_RAT | 52.57 | 48  | 175 | 19.7 | 10.14 | 1903.01 | (Q5XIF3) NADH dehydrogenase [ubiquinone] iron-sulfur protein 4, mitochondrial        |
| NDUS6_RAT | 21.55 | 4   | 116 | 12.8 | 9.25  | 114.91  | (P52504) NADH dehydrogenase [ubiquinone] iron-sulfur protein 6, mitochondrial        |
| NDUV2_RAT | 52.82 | 59  | 248 | 27.4 | 6.68  | 2448.96 | (P19234) NADH dehydrogenase [ubiquinone] flavoprotein 2,                             |

|           |       |    |     |      |      |         |                                                                          |
|-----------|-------|----|-----|------|------|---------|--------------------------------------------------------------------------|
|           |       |    |     |      |      |         | mitochondrial                                                            |
| NDUV3_RAT | 19.44 | 2  | 108 | 11.9 | 9.41 | 70.79   | (Q6PCU8) NADH dehydrogenase [ubiquinone] flavoprotein 3, mitochondrial   |
| NU1M_RAT  | 6.29  | 5  | 318 | 36.2 | 6.93 | 110.62  | (P03889) NADH-ubiquinone oxidoreductase chain 1                          |
| NU2M_RAT  | 6.96  | 2  | 345 | 38.5 | 9.89 | 79.33   | (P11662) NADH-ubiquinone oxidoreductase chain 2                          |
| NU3M_RAT  | 13.04 | 11 | 115 | 13.1 | 4.44 | 656.90  | (P05506) NADH-ubiquinone oxidoreductase chain 3                          |
| NU4M_RAT  | 19.17 | 28 | 459 | 51.8 | 9.41 | 1293.54 | (P05508) NADH-ubiquinone oxidoreductase chain 4                          |
| NU5M_RAT  | 11.48 | 13 | 610 | 68.9 | 9.26 | 447.69  | (P11661) NADH-ubiquinone oxidoreductase chain 5                          |
| ODPB_RAT  | 13.09 | 2  | 359 | 39.0 | 6.65 | 73.46   | (P49432) Pyruvate dehydrogenase E1 component subunit beta, mitochondrial |
| PRDX3_RAT | 16.34 | 2  | 257 | 28.3 | 7.55 | 82.46   | (Q9Z0V6) Thioredoxin-dependent peroxide reductase, mitochondrial         |
| PRDX5_RAT | 19.72 | 3  | 213 | 22.2 | 8.66 | 87.20   | (Q9R063) Peroxiredoxin-5, mitochondrial                                  |
| SAM50_RAT | 11.73 | 4  | 469 | 51.9 | 6.80 | 141.97  | (Q6AXV4) Sorting and assembly machinery component 50 homolog             |
| STA5B_RAT | 0.76  | 3  | 786 | 90.2 | 6.20 | 76.56   | (P52632) Signal transducer and activator                                 |

|           |       |    |     |      |      |        |                                                                         |
|-----------|-------|----|-----|------|------|--------|-------------------------------------------------------------------------|
|           |       |    |     |      |      |        | of transcription 5B                                                     |
| SUCA_RAT  | 13.87 | 8  | 346 | 36.1 | 9.48 | 393.61 | (P13086) Succinyl-CoA ligase [GDP-forming] subunit alpha, mitochondrial |
| THIL_RAT  | 16.27 | 6  | 424 | 44.7 | 8.76 | 210.51 | (P17764) Acetyl-CoA acetyltransferase, mitochondrial                    |
| UCRI_RAT  | 22.99 | 5  | 274 | 29.4 | 8.87 | 232.08 | (P20788) Cytochrome b-c1 complex subunit Rieske, mitochondrial          |
| USMG5_RAT | 44.83 | 7  | 58  | 6.4  | 9.83 | 428.61 | (Q9JJW3) Up-regulated during skeletal muscle growth protein 5           |
| IMMT_RAT  | 23.32 | 11 | 609 | 67.1 | 5.80 | 373.14 | (Q3KR86) Mitochondrial inner membrane protein                           |

Supplemental Table S5. Complex 2 band chymotrypsin digestion

| Accession | Coverage | Peptides | # AAs | MW [kDa] | calc. pI | Score   | Description                                                                             |
|-----------|----------|----------|-------|----------|----------|---------|-----------------------------------------------------------------------------------------|
| ACADL_RAT | 69.53    | 130      | 430   | 47.8     | 7.74     | 4118.24 | (P15650) Long-chain specific acyl-CoA dehydrogenase, mitochondrial                      |
| IDHP_RAT  | 45.58    | 39       | 452   | 50.9     | 8.69     | 1509.42 | (P56574) Isocitrate dehydrogenase [NADP], mitochondrial                                 |
| CISY_RAT  | 6.65     | 2        | 466   | 51.8     | 8.35     | 117.28  | (Q8VHF5) Citrate synthase, mitochondrial                                                |
| AATM_RAT  | 16.28    | 7        | 430   | 47.3     | 9.00     | 272.54  | (P00507) Aspartate aminotransferase, mitochondrial                                      |
| IVD_RAT   | 16.75    | 5        | 424   | 46.4     | 7.90     | 254.70  | (P12007) Isovaleryl-CoA dehydrogenase, mitochondrial                                    |
| MDHM_RAT  | 45.56    | 22       | 338   | 35.7     | 8.68     | 768.90  | (P04636) Malate dehydrogenase, mitochondrial                                            |
| THIM_RAT  | 78.84    | 121      | 397   | 41.8     | 7.94     | 5108.99 | (P13437) 3-ketoacyl-CoA thiolase, mitochondrial                                         |
| KCRS_RAT  | 8.59     | 2        | 419   | 47.4     | 8.51     | 117.04  | (P09605) Creatine kinase S-type, mitochondrial                                          |
| ODPA_RAT  | 15.13    | 6        | 390   | 43.2     | 8.19     | 283.85  | (P26284) Pyruvate dehydrogenase E1 component subunit alpha, somatic form, mitochondrial |

|           |       |    |     |      |      |         |                                                                                   |
|-----------|-------|----|-----|------|------|---------|-----------------------------------------------------------------------------------|
| ACON_RAT  | 23.97 | 22 | 780 | 85.4 | 7.83 | 969.01  | (Q9ER34) Aconitate hydratase, mitochondrial                                       |
| DHSA_RAT  | 41.16 | 46 | 656 | 71.6 | 7.17 | 1637.96 | (Q920L2) Succinate dehydrogenase [ubiquinone] flavoprotein subunit, mitochondrial |
| ACSL1_RAT | 8.44  | 3  | 699 | 78.1 | 6.99 | 112.94  | (P18163) Long-chain-fatty-acid--CoA ligase 1                                      |
| ETFD_RAT  | 15.58 | 9  | 616 | 68.2 | 7.56 | 288.50  | (Q6UPE1) Electron transfer flavoprotein-ubiquinone oxidoreductase, mitochondrial  |
| 3HIDH_RAT | 11.94 | 3  | 335 | 35.3 | 8.47 | 144.94  | (P29266) 3-hydroxyisobutyrate dehydrogenase, mitochondrial                        |
| ADT1_RAT  | 45.64 | 37 | 298 | 33.0 | 9.79 | 1523.94 | (Q05962) ADP/ATP translocase 1                                                    |
| ADT2_RAT  | 44.63 | 19 | 298 | 32.9 | 9.73 | 1032.60 | (Q09073) ADP/ATP translocase 2                                                    |
| DHSB_RAT  | 21.28 | 7  | 282 | 31.8 | 8.68 | 366.13  | (P21913) Succinate dehydrogenase [ubiquinone] iron-sulfur subunit, mitochondrial  |
| ACADV_RAT | 28.09 | 16 | 655 | 70.7 | 8.90 | 688.71  | (P45953) Very long-chain specific acyl-CoA dehydrogenase, mitochondrial           |
| BCAT2_RAT | 12.47 | 6  | 393 | 44.2 | 8.16 | 220.65  | (O35854) Branched-chain-amino-acid aminotransferase, mitochondrial                |

|                 |       |    |     |      |      |         |                                                                                               |
|-----------------|-------|----|-----|------|------|---------|-----------------------------------------------------------------------------------------------|
| BR44L_MOUS<br>E | 31.19 | 2  | 109 | 12.4 | 9.61 | 109.89  | (P63030) Brain protein<br>44-like protein                                                     |
| CISD1_RAT       | 24.07 | 2  | 108 | 12.1 | 8.84 | 104.63  | (B0K020) CDGSH iron<br>sulfur domain-containing<br>protein 1                                  |
| CTRB1_RAT       | 4.56  | 4  | 263 | 27.8 | 5.07 | 144.16  | (P07338)<br>Chymotrypsinogen B                                                                |
| GRP75_RAT       | 9.28  | 4  | 679 | 73.8 | 6.30 | 117.71  | (P48721) Stress-70<br>protein, mitochondrial                                                  |
| HCD2_RAT        | 10.73 | 2  | 261 | 27.2 | 8.78 | 62.60   | (O70351) 3-hydroxyacyl-<br>CoA dehydrogenase<br>type-2                                        |
| MMSA_RAT        | 10.28 | 2  | 535 | 57.8 | 8.22 | 119.33  | (Q02253)<br>Methylmalonate-<br>semialdehyde<br>dehydrogenase<br>[acylating],<br>mitochondrial |
| ODPB_RAT        | 13.93 | 6  | 359 | 39.0 | 6.65 | 317.65  | (P49432) Pyruvate<br>dehydrogenase E1<br>component subunit<br>beta, mitochondrial             |
| SCOT1_RAT       | 5.58  | 5  | 520 | 56.2 | 8.47 | 226.81  | (B2GV06) Succinyl-<br>CoA:3-ketoacid-<br>coenzyme A transferase<br>1, mitochondrial           |
| SUCA_RAT        | 18.79 | 8  | 346 | 36.1 | 9.48 | 301.57  | (P13086) Succinyl-CoA<br>ligase [GDP-forming]<br>subunit alpha,<br>mitochondrial              |
| THIL_RAT        | 53.54 | 41 | 424 | 44.7 | 8.76 | 1401.32 | (P17764) Acetyl-CoA<br>acetyltransferase,<br>mitochondrial                                    |
| TRXR2_RAT       | 27.76 | 8  | 526 | 56.5 | 8.56 | 346.90  | (Q9Z0J5) Thioredoxin<br>reductase 2,                                                          |

|  |  |  |  |  |  |  |               |
|--|--|--|--|--|--|--|---------------|
|  |  |  |  |  |  |  | mitochondrial |
|  |  |  |  |  |  |  |               |

Supplemental Table S6. Complex 2 band trypsin digestion

| Accession | Coverage | Peptides | # AAs | MW [kDa] | calc. pI | Score    | Description                                                         |
|-----------|----------|----------|-------|----------|----------|----------|---------------------------------------------------------------------|
| ACADL_RAT | 76.74    | 617      | 430   | 47.8     | 7.74     | 26258.97 | (P15650) Long-chain specific acyl-CoA dehydrogenase, mitochondrial  |
| IDHP_RAT  | 72.57    | 265      | 452   | 50.9     | 8.69     | 11109.43 | (P56574) Isocitrate dehydrogenase [NADP], mitochondrial             |
| QCR2_RAT  | 12.83    | 5        | 452   | 48.4     | 9.14     | 222.71   | (P32551) Cytochrome b-c1 complex subunit 2, mitochondrial           |
| ATPA_RAT  | 16.64    | 6        | 553   | 59.7     | 9.19     | 601.41   | (P15999) ATP synthase subunit alpha, mitochondrial                  |
| CISY_RAT  | 35.84    | 35       | 466   | 51.8     | 8.35     | 1251.73  | (Q8VHF5) Citrate synthase, mitochondrial                            |
| AATM_RAT  | 51.16    | 28       | 430   | 47.3     | 9.00     | 771.53   | (P00507) Aspartate aminotransferase, mitochondrial                  |
| IVD_RAT   | 61.08    | 80       | 424   | 46.4     | 7.90     | 3099.53  | (P12007) Isovaleryl-CoA dehydrogenase, mitochondrial                |
| MDHM_RAT  | 62.43    | 95       | 338   | 35.7     | 8.68     | 4241.19  | (P04636) Malate dehydrogenase, mitochondrial                        |
| ACADS_RAT | 35.68    | 13       | 412   | 44.7     | 8.28     | 753.85   | (P15651) Short-chain specific acyl-CoA dehydrogenase, mitochondrial |

|           |       |     |      |           |      |              |                                                                                                     |
|-----------|-------|-----|------|-----------|------|--------------|-----------------------------------------------------------------------------------------------------|
| TRY1_RAT  | 8.13  | 8   | 246  | 25.9      | 4.89 | 259.11       | (P00762) RecName:<br>Full=Anionic trypsin-1;                                                        |
| DLDH_RAT  | 26.52 | 11  | 509  | 54.0      | 7.87 | 475.05       | (Q6P6R2) Dihydrolipoyl<br>dehydrogenase,<br>mitochondrial                                           |
| THIM_RAT  | 86.15 | 832 | 397  | 41.8      | 7.94 | 40807.6<br>3 | (P13437) 3-ketoacyl-CoA<br>thiolase, mitochondrial                                                  |
| KCRS_RAT  | 37.95 | 20  | 419  | 47.4      | 8.51 | 1039.51      | (P09605) Creatine kinase<br>S-type, mitochondrial                                                   |
| ACOT2_RAT | 7.95  | 2   | 453  | 49.7      | 7.83 | 110.78       | (O55171) Acyl-coenzyme<br>A thioesterase 2,<br>mitochondrial                                        |
| ODPA_RAT  | 51.28 | 31  | 390  | 43.2      | 8.19 | 1170.60      | (P26284) Pyruvate<br>dehydrogenase E1<br>component subunit alpha,<br>somatic form,<br>mitochondrial |
| ETFA_RAT  | 24.62 | 4   | 333  | 34.9      | 8.38 | 211.99       | (P13803) Electron<br>transfer flavoprotein<br>subunit alpha,<br>mitochondrial                       |
| K1C10_RAT | 3.61  | 2   | 526  | 56.5      | 5.15 | 76.14        | (Q6IFW6) Keratin, type I<br>cytoskeletal 10                                                         |
| K1C14_RAT | 4.54  | 2   | 485  | 52.7      | 5.16 | 111.63       | (Q6IFV1) Keratin, type I<br>cytoskeletal 14                                                         |
| K2C6A_RAT | 3.99  | 2   | 552  | 59.2      | 7.94 | 112.66       | (Q4FZU2) Keratin, type<br>II cytoskeletal 6A                                                        |
| K2C5_RAT  | 3.82  | 2   | 576  | 61.8      | 7.80 | 81.76        | (Q6P6Q2) Keratin, type II<br>cytoskeletal 5                                                         |
| LPPRC_RAT | 10.63 | 9   | 1392 | 156.<br>6 | 6.61 | 319.19       | (Q5SGE0) Leucine-rich<br>PPR motif-containing<br>protein, mitochondrial                             |
| K2C1_RAT  | 5.28  | 5   | 625  | 64.8      | 7.87 | 206.85       | (Q6IMF3) Keratin, type II<br>cytoskeletal 1                                                         |



|            |       |     |     |      |      |          |                                                                                   |
|------------|-------|-----|-----|------|------|----------|-----------------------------------------------------------------------------------|
| K2C1B_RAT  | 4.24  | 3   | 519 | 57.2 | 5.64 | 137.33   | (Q6IG01) Keratin, type II cytoskeletal 1b                                         |
| ACON_RAT   | 60.51 | 159 | 780 | 85.4 | 7.83 | 6776.00  | (Q9ER34) Aconitate hydratase, mitochondrial                                       |
| DHSA_RAT   | 75.61 | 318 | 656 | 71.6 | 7.17 | 12143.92 | (Q920L2) Succinate dehydrogenase [ubiquinone] flavoprotein subunit, mitochondrial |
| NDUS1_RAT  | 29.85 | 23  | 727 | 79.4 | 5.90 | 961.64   | (Q66HF1) NADH-ubiquinone oxidoreductase 75 kDa subunit, mitochondrial             |
| ACSL1_RAT  | 42.78 | 38  | 699 | 78.1 | 6.99 | 1678.01  | (P18163) Long-chain-fatty-acid--CoA ligase 1                                      |
| ETFD_RAT   | 52.60 | 66  | 616 | 68.2 | 7.56 | 2120.48  | (Q6UPE1) Electron transfer flavoprotein-ubiquinone oxidoreductase, mitochondrial  |
| ACSF2_RAT  | 9.59  | 4   | 615 | 67.8 | 8.12 | 153.19   | (Q499N5) Acyl-CoA synthetase family member 2, mitochondrial                       |
| FUMH_RAT   | 27.42 | 9   | 507 | 54.4 | 8.95 | 335.28   | (P14408) Fumarate hydratase, mitochondrial                                        |
| EFTU_RAT   | 12.17 | 5   | 452 | 49.5 | 7.56 | 166.27   | (P85834) Elongation factor Tu, mitochondrial                                      |
| CH60_MOUSE | 6.98  | 3   | 573 | 60.9 | 6.18 | 187.14   | (P63038) 60 kDa heat shock protein, mitochondrial                                 |
| NFS1_RAT   | 6.21  | 3   | 451 | 50.0 | 8.72 | 121.66   | (Q99P39) Cysteine desulfurase, mitochondrial                                      |
| 3HIDH_RAT  | 53.43 | 50  | 335 | 35.3 | 8.47 | 2511.43  | (P29266) 3-hydroxyisobutyrate dehydrogenase,                                      |

|           |       |     |     |      |       |          |                                                                     |
|-----------|-------|-----|-----|------|-------|----------|---------------------------------------------------------------------|
|           |       |     |     |      |       |          | mitochondrial                                                       |
| ATPB_RAT  | 25.52 | 11  | 529 | 56.3 | 5.34  | 429.93   | (P10719) ATP synthase subunit beta, mitochondrial                   |
| ADT1_RAT  | 75.50 | 416 | 298 | 33.0 | 9.79  | 20751.42 | (Q05962) ADP/ATP translocase 1                                      |
| ADT2_RAT  | 47.99 | 276 | 298 | 32.9 | 9.73  | 15013.86 | (Q09073) ADP/ATP translocase 2                                      |
| G3P_RAT   | 25.23 | 8   | 333 | 35.8 | 8.03  | 395.29   | (P04797) Glyceraldehyde-3-phosphate dehydrogenase                   |
| CYC_MOUSE | 24.76 | 3   | 105 | 11.6 | 9.58  | 149.46   | (P62897) Cytochrome c, somatic                                      |
| BR44_RAT  | 18.11 | 5   | 127 | 14.2 | 10.48 | 168.81   | (P38718) Brain protein 44                                           |
| ODBB_RAT  | 40.26 | 18  | 390 | 42.8 | 6.83  | 663.87   | (P35738) 2-oxoisovalerate dehydrogenase subunit beta, mitochondrial |
| VDAC1_RAT | 49.47 | 19  | 283 | 30.7 | 8.54  | 1083.67  | (Q9Z2L0) Voltage-dependent anion-selective channel protein 1        |
| VDAC2_RAT | 8.81  | 3   | 295 | 31.7 | 7.49  | 224.69   | (P81155) Voltage-dependent anion-selective channel protein 2        |
| VDAC3_RAT | 9.19  | 3   | 283 | 30.8 | 8.70  | 173.87   | (Q9R1Z0) Voltage-dependent anion-selective channel protein 3        |
| MPCP_RAT  | 31.18 | 46  | 356 | 39.4 | 9.33  | 1426.46  | (P16036) Phosphate carrier protein, mitochondrial                   |
| ETFB_RAT  | 10.98 | 2   | 255 | 27.7 | 7.75  | 116.43   | (Q68FU3) Electron transfer flavoprotein subunit beta                |

|             |       |     |     |      |       |         |                                                                                  |
|-------------|-------|-----|-----|------|-------|---------|----------------------------------------------------------------------------------|
| DHSB_RAT    | 72.70 | 67  | 282 | 31.8 | 8.68  | 2196.42 | (P21913) Succinate dehydrogenase [ubiquinone] iron-sulfur subunit, mitochondrial |
| HCDH_RAT    | 39.17 | 17  | 314 | 34.4 | 8.76  | 609.33  | (Q9WVK7) Hydroxyacyl-coenzyme A dehydrogenase, mitochondrial                     |
| ACADV_RAT   | 62.14 | 102 | 655 | 70.7 | 8.90  | 4923.78 | (P45953) Very long-chain specific acyl-CoA dehydrogenase, mitochondrial          |
| ACDSB_RAT   | 7.41  | 3   | 432 | 47.8 | 8.06  | 147.40  | (P70584) Short/branched chain specific acyl-CoA dehydrogenase, mitochondrial     |
| AL4A1_RAT   | 5.51  | 3   | 563 | 61.8 | 7.46  | 86.48   | (P0C2X9) Delta-1-pyrroline-5-carboxylate dehydrogenase, mitochondrial            |
| AOFA_RAT    | 8.37  | 3   | 526 | 59.5 | 7.93  | 153.76  | (P21396) Amine oxidase [flavin-containing] A                                     |
| ATPO_RAT    | 25.82 | 3   | 213 | 23.4 | 10.02 | 122.38  | (Q06647) ATP synthase subunit O, mitochondrial                                   |
| BCAT2_RAT   | 48.85 | 42  | 393 | 44.2 | 8.16  | 1355.62 | (O35854) Branched-chain-amino-acid aminotransferase, mitochondrial               |
| BDH_RAT     | 27.70 | 10  | 343 | 38.2 | 8.84  | 590.21  | (P29147) D-beta-hydroxybutyrate dehydrogenase, mitochondrial                     |
| BR44L_MOUSE | 43.12 | 9   | 109 | 12.4 | 9.61  | 493.61  | (P63030) Brain protein 44-like protein                                           |
| CACP_RAT    | 16.61 | 8   | 626 | 70.8 | 8.54  | 322.00  | (Q704S8) Carnitine O-acetyltransferase                                           |

|           |       |    |     |      |      |         |                                                                                         |
|-----------|-------|----|-----|------|------|---------|-----------------------------------------------------------------------------------------|
| CD36_RAT  | 6.78  | 2  | 472 | 52.7 | 8.56 | 61.30   | (Q07969) Platelet glycoprotein 4                                                        |
| CH10_RAT  | 47.06 | 8  | 102 | 10.9 | 8.92 | 357.50  | (P26772) 10 kDa heat shock protein, mitochondrial                                       |
| CISD1_RAT | 44.44 | 5  | 108 | 12.1 | 8.84 | 216.13  | (B0K020) CDGSH iron sulfur domain-containing protein 1                                  |
| CPT1B_RAT | 15.67 | 15 | 772 | 88.2 | 8.60 | 535.92  | (Q63704) Carnitine O-palmitoyltransferase 1, muscle isoform                             |
| CPT2_RAT  | 29.33 | 22 | 658 | 74.1 | 7.33 | 769.25  | (P18886) Carnitine O-palmitoyltransferase 2, mitochondrial                              |
| D3D2_RAT  | 28.03 | 8  | 289 | 32.2 | 9.54 | 305.06  | (P23965) 3,2-trans-enoyl-CoA isomerase, mitochondrial                                   |
| DECR_RAT  | 18.81 | 5  | 335 | 36.1 | 8.94 | 180.79  | (Q64591) 2,4-dienoyl-CoA reductase, mitochondrial                                       |
| DHB8_RAT  | 9.65  | 2  | 259 | 26.8 | 6.55 | 101.04  | (Q6MGB5) Estradiol 17-beta-dehydrogenase 8                                              |
| DHSD_RAT  | 20.75 | 28 | 159 | 17.0 | 9.29 | 1413.61 | (Q6PCT8) Succinate dehydrogenase [ubiquinone] cytochrome b small subunit, mitochondrial |
| ECHM_RAT  | 41.72 | 19 | 290 | 31.5 | 8.13 | 993.53  | (P14604) Enoyl-CoA hydratase, mitochondrial                                             |
| ES1_RAT   | 24.81 | 4  | 266 | 28.2 | 8.92 | 125.66  | (P56571) ES1 protein homolog, mitochondrial                                             |
| F162A_RAT | 16.77 | 4  | 155 | 17.8 | 9.99 | 87.89   | (Q4QQV3) Protein FAM162A                                                                |
| GHITM_RAT | 6.65  | 3  | 346 | 37.2 | 9.79 | 132.04  | (Q5XIA8) Growth hormone-inducible                                                       |

|           |       |    |     |       |      |         |                                                                               |
|-----------|-------|----|-----|-------|------|---------|-------------------------------------------------------------------------------|
|           |       |    |     |       |      |         | transmembrane protein                                                         |
| GRP75_RAT | 24.74 | 17 | 679 | 73.8  | 6.30 | 890.47  | (P48721) Stress-70 protein, mitochondrial                                     |
| GSTK1_RAT | 13.27 | 2  | 226 | 25.5  | 9.07 | 58.51   | (P24473) Glutathione S-transferase kappa 1                                    |
| HCD2_RAT  | 80.08 | 37 | 261 | 27.2  | 8.78 | 1716.06 | (O70351) 3-hydroxyacyl-CoA dehydrogenase type-2                               |
| HSDL2_RAT | 24.81 | 17 | 524 | 58.3  | 6.19 | 829.71  | (Q4V8F9) Hydroxysteroid dehydrogenase-like protein 2                          |
| ISOC2_RAT | 33.33 | 7  | 210 | 23.1  | 7.83 | 240.90  | (Q5U3Z3) Isochorismatase domain-containing protein 2, mitochondrial           |
| LONM_RAT  | 2.95  | 2  | 950 | 105.7 | 6.60 | 48.31   | (Q924S5) Lon protease homolog, mitochondrial                                  |
| M2OM_RAT  | 41.72 | 22 | 314 | 34.2  | 9.88 | 777.36  | (P97700) Mitochondrial 2-oxoglutarate/malate carrier protein                  |
| MCAT_RAT  | 45.85 | 18 | 301 | 33.1  | 9.48 | 440.37  | (P97521) Mitochondrial carnitine/acylcarnitine carrier protein                |
| MMSA_RAT  | 41.50 | 25 | 535 | 57.8  | 8.22 | 1006.25 | (Q02253) Methylmalonate-semialdehyde dehydrogenase [acylating], mitochondrial |
| NDUV2_RAT | 18.95 | 3  | 248 | 27.4  | 6.68 | 148.77  | (P19234) NADH dehydrogenase [ubiquinone] flavoprotein 2, mitochondrial        |
| ODBA_RAT  | 38.32 | 21 | 441 | 50.1  | 7.83 | 596.95  | (P11960) 2-oxoisovalerate dehydrogenase subunit                               |

|           |       |    |     |      |      |         |                                                                                   |
|-----------|-------|----|-----|------|------|---------|-----------------------------------------------------------------------------------|
|           |       |    |     |      |      |         | alpha, mitochondrial                                                              |
| ODPB_RAT  | 58.77 | 41 | 359 | 39.0 | 6.65 | 1502.42 | (P49432) Pyruvate dehydrogenase E1 component subunit beta, mitochondrial          |
| PECL_RAT  | 12.28 | 3  | 391 | 43.0 | 8.98 | 170.76  | (Q5XIC0) Peroxisomal 3,2-trans-enoyl-CoA isomerase                                |
| PECR_RAT  | 10.56 | 2  | 303 | 32.4 | 8.69 | 82.12   | (Q9WVK3) Peroxisomal trans-2-enoyl-CoA reductase                                  |
| PRDX5_RAT | 12.21 | 2  | 213 | 22.2 | 8.66 | 101.47  | (Q9R063) Peroxiredoxin-5, mitochondrial                                           |
| PYRD2_RAT | 14.80 | 5  | 581 | 62.8 | 8.18 | 248.21  | (Q68FT3) Pyridine nucleotide-disulfide oxidoreductase domain-containing protein 2 |
| SCOT1_RAT | 44.62 | 38 | 520 | 56.2 | 8.47 | 1821.95 | (B2GV06) Succinyl-CoA:3-ketoacid-coenzyme A transferase 1, mitochondrial          |
| SCPDH_RAT | 10.02 | 2  | 429 | 47.1 | 8.84 | 51.30   | (Q6AY30) Probable saccharopine dehydrogenase                                      |
| SUCA_RAT  | 32.37 | 15 | 346 | 36.1 | 9.48 | 614.84  | (P13086) Succinyl-CoA ligase [GDP-forming] subunit alpha, mitochondrial           |
| THIL_RAT  | 61.32 | 56 | 424 | 44.7 | 8.76 | 2141.79 | (P17764) Acetyl-CoA acetyltransferase, mitochondrial                              |
| TM14C_RAT | 25.22 | 4  | 115 | 11.8 | 9.41 | 169.31  | (Q924P2) Transmembrane protein 14C                                                |
| USMG5_RAT | 44.83 | 2  | 58  | 6.4  | 9.83 | 108.14  | (Q9JJW3) Up-regulated during skeletal muscle                                      |

|           |       |    |     |      |      |        |                                                        |
|-----------|-------|----|-----|------|------|--------|--------------------------------------------------------|
|           |       |    |     |      |      |        | growth protein 5                                       |
| IMMT_RAT  | 10.51 | 5  | 609 | 67.1 | 5.80 | 221.11 | (Q3KR86) Mitochondrial inner membrane protein          |
| DHRS4_RAT | 12.54 | 4  | 279 | 29.8 | 9.55 | 246.65 | (Q8VID1) Dehydrogenase/reductase SDR family member 4   |
| AL7A1_RAT | 5.01  | 2  | 539 | 58.7 | 7.87 | 66.72  | (Q64057) Alpha-amino adipic semialdehyde dehydrogenase |
| GPX1_RAT  | 62.69 | 12 | 201 | 22.2 | 7.87 | 337.08 | (P04041) Glutathione peroxidase 1                      |
| TRXR2_RAT | 34.98 | 21 | 526 | 56.5 | 8.56 | 940.62 | (Q9Z0J5) Thioredoxin reductase 2, mitochondrial        |

Supplemental Table S7. Complex 3 band chymotrypsin digestion

| Accession | Coverage | Peptides | # AAs | MW [kDa] | calc. pI | Score   | Description                                                |
|-----------|----------|----------|-------|----------|----------|---------|------------------------------------------------------------|
| IDHP_RAT  | 11.73    | 4        | 452   | 50.9     | 8.69     | 184.79  | (P56574) Isocitrate dehydrogenase [NADP], mitochondrial    |
| QCR2_RAT  | 78.76    | 167      | 452   | 48.4     | 9.14     | 6450.27 | (P32551) Cytochrome b-c1 complex subunit 2, mitochondrial  |
| ATPA_RAT  | 8.68     | 3        | 553   | 59.7     | 9.19     | 87.38   | (P15999) ATP synthase subunit alpha, mitochondrial         |
| AATM_RAT  | 27.91    | 11       | 430   | 47.3     | 9.00     | 371.22  | (P00507) Aspartate aminotransferase, mitochondrial         |
| MDHM_RAT  | 25.44    | 11       | 338   | 35.7     | 8.68     | 349.11  | (P04636) Malate dehydrogenase, mitochondrial               |
| ECHA_RAT  | 38.93    | 38       | 763   | 82.6     | 9.06     | 1351.69 | (Q64428) Trifunctional enzyme subunit alpha, mitochondrial |
| KCRS_RAT  | 61.10    | 186      | 419   | 47.4     | 8.51     | 6050.56 | (P09605) Creatine kinase S-type, mitochondrial             |
| COX7B_RAT | 16.25    | 4        | 80    | 9.0      | 10.11    | 123.65  | (P80431) Cytochrome c oxidase subunit 7B, mitochondrial    |
| ECHB_RAT  | 40.00    | 27       | 475   | 51.4     | 9.47     | 1092.75 | (Q60587) Trifunctional enzyme subunit beta, mitochondrial  |
| ACON_RAT  | 7.82     | 5        | 780   | 85.4     | 7.83     | 151.14  | (Q9ER34) Aconitate hydratase, mitochondrial                |
| QCR1_RAT  | 71.25    | 109      | 480   | 52.8     | 5.88     | 3815.28 | (Q68FY0) Cytochrome b-c1 complex subunit 1,                |



|             |       |    |     |      |      |        |                                                                         |
|-------------|-------|----|-----|------|------|--------|-------------------------------------------------------------------------|
|             |       |    |     |      |      |        | mitochondrial                                                           |
| CH60_MOUSE  | 13.96 | 6  | 573 | 60.9 | 6.18 | 179.51 | (P63038) 60 kDa heat shock protein, mitochondrial                       |
| COX5A_RAT   | 41.10 | 7  | 146 | 16.1 | 6.54 | 202.20 | (P11240) Cytochrome c oxidase subunit 5A, mitochondrial                 |
| ATPB_RAT    | 10.21 | 7  | 529 | 56.3 | 5.34 | 180.55 | (P10719) ATP synthase subunit beta, mitochondrial                       |
| ADT1_RAT    | 31.21 | 14 | 298 | 33.0 | 9.79 | 465.64 | (Q05962) ADP/ATP translocase 1                                          |
| ADT2_RAT    | 11.07 | 4  | 298 | 32.9 | 9.73 | 229.50 | (Q09073) ADP/ATP translocase 2                                          |
| SODM_RAT    | 18.47 | 4  | 222 | 24.7 | 8.81 | 106.66 | (P07895) Superoxide dismutase [Mn], mitochondrial                       |
| VDAC1_RAT   | 42.76 | 18 | 283 | 30.7 | 8.54 | 483.33 | (Q9Z2L0) Voltage-dependent anion-selective channel protein 1            |
| VDAC3_RAT   | 16.61 | 3  | 283 | 30.8 | 8.70 | 234.72 | (Q9R1Z0) Voltage-dependent anion-selective channel protein 3            |
| ACADV_RAT   | 14.35 | 6  | 655 | 70.7 | 8.90 | 203.14 | (P45953) Very long-chain specific acyl-CoA dehydrogenase, mitochondrial |
| BR44L_MOUSE | 31.19 | 2  | 109 | 12.4 | 9.61 | 78.66  | (P63030) Brain protein 44-like protein                                  |
| COX1_RAT    | 5.84  | 3  | 514 | 56.9 | 6.80 | 150.50 | (P05503) Cytochrome c oxidase subunit 1                                 |
| COX2_RAT    | 32.60 | 19 | 227 | 25.9 | 4.73 | 521.15 | (P00406) Cytochrome c oxidase subunit 2                                 |

|           |       |    |     |      |       |        |                                                                               |
|-----------|-------|----|-----|------|-------|--------|-------------------------------------------------------------------------------|
| COX41_RAT | 31.95 | 18 | 169 | 19.5 | 9.44  | 604.77 | (P10888) Cytochrome c oxidase subunit 4 isoform 1, mitochondrial              |
| COX5B_RAT | 13.18 | 2  | 129 | 13.9 | 7.78  | 134.28 | (P12075) Cytochrome c oxidase subunit 5B, mitochondrial                       |
| CX6C2_RAT | 59.21 | 13 | 76  | 8.4  | 10.07 | 374.14 | (P11951) Cytochrome c oxidase subunit 6C-2                                    |
| CTRB1_RAT | 3.80  | 4  | 263 | 27.8 | 5.07  | 203.71 | (P07338) Chymotrypsinogen B                                                   |
| CX6A1_RAT | 27.03 | 5  | 111 | 12.3 | 9.32  | 177.08 | (P10818) Cytochrome c oxidase subunit 6A1, mitochondrial                      |
| CX6A2_RAT | 41.49 | 14 | 94  | 10.5 | 9.07  | 498.53 | (P10817) Cytochrome c oxidase subunit 6A2, mitochondrial                      |
| CYB_RAT   | 12.37 | 8  | 380 | 43.0 | 7.99  | 331.49 | (P00159) Cytochrome b                                                         |
| GRP75_RAT | 10.31 | 5  | 679 | 73.8 | 6.30  | 129.90 | (P48721) Stress-70 protein, mitochondrial                                     |
| MCCB_RAT  | 5.86  | 2  | 563 | 61.5 | 8.31  | 76.19  | (Q5XIT9) Methylcrotonoyl-CoA carboxylase beta chain, mitochondrial            |
| MMSA_RAT  | 22.43 | 9  | 535 | 57.8 | 8.22  | 312.38 | (Q02253) Methylmalonate-semialdehyde dehydrogenase [acylating], mitochondrial |
| PECL_RAT  | 8.44  | 2  | 391 | 43.0 | 8.98  | 90.69  | (Q5XIC0) Peroxisomal 3,2-trans-enoyl-CoA isomerase                            |
| QCR8_RAT  | 31.71 | 7  | 82  | 9.8  | 10.52 | 156.80 | (Q7TQ16) Cytochrome b-c1 complex subunit 8                                    |
| SUCA_RAT  | 17.34 | 5  | 346 | 36.1 | 9.48  | 189.56 | (P13086) Succinyl-CoA                                                         |

|          |       |    |     |      |      |             |                                                                       |
|----------|-------|----|-----|------|------|-------------|-----------------------------------------------------------------------|
|          |       |    |     |      |      |             | ligase [GDP-forming]<br>subunit alpha,<br>mitochondrial               |
| THIL_RAT | 8.02  | 3  | 424 | 44.7 | 8.76 | 193.30      | (P17764) Acetyl-CoA<br>acetyltransferase,<br>mitochondrial            |
| UCRI_RAT | 75.91 | 56 | 274 | 29.4 | 8.87 | 1789.4<br>7 | (P20788) Cytochrome b-<br>c1 complex subunit<br>Rieske, mitochondrial |
| IMMT_RAT | 4.60  | 2  | 609 | 67.1 | 5.80 | 97.70       | (Q3KR86)<br>Mitochondrial inner<br>membrane protein                   |
|          |       |    |     |      |      |             |                                                                       |

Supplemental Table S8. Complex 3 band trypsin digestion

| Accession | Coverage | Peptides | # AAs | MW [kDa] | calc. pI | Score    | Description                                                |
|-----------|----------|----------|-------|----------|----------|----------|------------------------------------------------------------|
| IDHP_RAT  | 35.40    | 17       | 452   | 50.9     | 8.69     | 544.64   | (P56574) Isocitrate dehydrogenase [NADP], mitochondrial    |
| QCR2_RAT  | 64.82    | 336      | 452   | 48.4     | 9.14     | 13815.08 | (P32551) Cytochrome b-c1 complex subunit 2, mitochondrial  |
| ATPA_RAT  | 33.09    | 28       | 553   | 59.7     | 9.19     | 1378.09  | (P15999) ATP synthase subunit alpha, mitochondrial         |
| CISY_RAT  | 13.95    | 6        | 466   | 51.8     | 8.35     | 211.90   | (Q8VHF5) Citrate synthase, mitochondrial                   |
| AATM_RAT  | 56.98    | 34       | 430   | 47.3     | 9.00     | 1317.64  | (P00507) Aspartate aminotransferase, mitochondrial         |
| MDHM_RAT  | 42.01    | 26       | 338   | 35.7     | 8.68     | 1380.43  | (P04636) Malate dehydrogenase, mitochondrial               |
| TRY1_RAT  | 8.13     | 8        | 246   | 25.9     | 4.89     | 312.81   | (P00762) RecName: Full=Anionic trypsin-1;                  |
| ECHA_RAT  | 57.93    | 134      | 763   | 82.6     | 9.06     | 5622.67  | (Q64428) Trifunctional enzyme subunit alpha, mitochondrial |
| KCRS_RAT  | 60.14    | 494      | 419   | 47.4     | 8.51     | 24682.35 | (P09605) Creatine kinase S-type, mitochondrial             |
| ODPA_RAT  | 11.28    | 2        | 390   | 43.2     | 8.19     | 94.74    | (P26284) Pyruvate dehydrogenase E1                         |

|            |       |     |     |      |      |          |                                                                                   |
|------------|-------|-----|-----|------|------|----------|-----------------------------------------------------------------------------------|
|            |       |     |     |      |      |          | component subunit alpha, somatic form, mitochondrial                              |
| ECHB_RAT   | 56.42 | 102 | 475 | 51.4 | 9.47 | 4095.35  | (Q60587) Trifunctional enzyme subunit beta, mitochondrial                         |
| ATPG_RAT   | 13.19 | 3   | 273 | 30.2 | 8.84 | 150.80   | (P35435) ATP synthase subunit gamma, mitochondrial                                |
| ACON_RAT   | 25.13 | 18  | 780 | 85.4 | 7.83 | 750.31   | (Q9ER34) Aconitate hydratase, mitochondrial                                       |
| DHSA_RAT   | 8.99  | 2   | 656 | 71.6 | 7.17 | 91.86    | (Q920L2) Succinate dehydrogenase [ubiquinone] flavoprotein subunit, mitochondrial |
| ACSL1_RAT  | 9.44  | 4   | 699 | 78.1 | 6.99 | 184.83   | (P18163) Long-chain-fatty-acid--CoA ligase 1                                      |
| QCR1_RAT   | 61.67 | 386 | 480 | 52.8 | 5.88 | 17472.63 | (Q68FY0) Cytochrome b-c1 complex subunit 1, mitochondrial                         |
| CH60_MOUSE | 28.10 | 14  | 573 | 60.9 | 6.18 | 614.65   | (P63038) 60 kDa heat shock protein, mitochondrial                                 |
| COX5A_RAT  | 54.11 | 28  | 146 | 16.1 | 6.54 | 1058.27  | (P11240) Cytochrome c oxidase subunit 5A, mitochondrial                           |
| ATPB_RAT   | 59.17 | 30  | 529 | 56.3 | 5.34 | 1272.75  | (P10719) ATP synthase subunit beta, mitochondrial                                 |
| ADT1_RAT   | 56.04 | 56  | 298 | 33.0 | 9.79 | 2561.90  | (Q05962) ADP/ATP translocase 1                                                    |

|           |       |    |     |      |       |         |                                                                         |
|-----------|-------|----|-----|------|-------|---------|-------------------------------------------------------------------------|
| ADT2_RAT  | 28.86 | 34 | 298 | 32.9 | 9.73  | 1594.74 | (Q09073) ADP/ATP translocase 2                                          |
| BR44_RAT  | 16.54 | 4  | 127 | 14.2 | 10.48 | 106.03  | (P38718) Brain protein 44                                               |
| SODM_RAT  | 32.88 | 5  | 222 | 24.7 | 8.81  | 247.44  | (P07895) Superoxide dismutase [Mn], mitochondrial                       |
| VDAC1_RAT | 55.48 | 22 | 283 | 30.7 | 8.54  | 1161.75 | (Q9Z2L0) Voltage-dependent anion-selective channel protein 1            |
| VDAC2_RAT | 41.36 | 16 | 295 | 31.7 | 7.49  | 566.73  | (P81155) Voltage-dependent anion-selective channel protein 2            |
| VDAC3_RAT | 20.14 | 7  | 283 | 30.8 | 8.70  | 231.19  | (Q9R1Z0) Voltage-dependent anion-selective channel protein 3            |
| MPCP_RAT  | 14.33 | 7  | 356 | 39.4 | 9.33  | 341.99  | (P16036) Phosphate carrier protein, mitochondrial                       |
| ACADV_RAT | 27.94 | 24 | 655 | 70.7 | 8.90  | 1205.66 | (P45953) Very long-chain specific acyl-CoA dehydrogenase, mitochondrial |
| AOFA_RAT  | 6.65  | 3  | 526 | 59.5 | 7.93  | 214.91  | (P21396) Amine oxidase [flavin-containing] A                            |
| ATP5H_RAT | 10.56 | 3  | 161 | 18.8 | 6.60  | 94.73   | (P31399) ATP synthase subunit d, mitochondrial                          |
| ATPO_RAT  | 16.90 | 3  | 213 | 23.4 | 10.02 | 78.54   | (Q06647) ATP synthase subunit O, mitochondrial                          |

|             |       |    |     |      |       |         |                                                                  |
|-------------|-------|----|-----|------|-------|---------|------------------------------------------------------------------|
| BR44L_MOUSE | 43.12 | 4  | 109 | 12.4 | 9.61  | 238.50  | (P63030) Brain protein 44-like protein                           |
| COX1_RAT    | 6.42  | 4  | 514 | 56.9 | 6.80  | 302.07  | (P05503) Cytochrome c oxidase subunit 1                          |
| COX2_RAT    | 33.04 | 50 | 227 | 25.9 | 4.73  | 1714.21 | (P00406) Cytochrome c oxidase subunit 2                          |
| COX41_RAT   | 31.95 | 22 | 169 | 19.5 | 9.44  | 1087.13 | (P10888) Cytochrome c oxidase subunit 4 isoform 1, mitochondrial |
| COX5B_RAT   | 42.64 | 19 | 129 | 13.9 | 7.78  | 878.82  | (P12075) Cytochrome c oxidase subunit 5B, mitochondrial          |
| CX6C2_RAT   | 51.32 | 6  | 76  | 8.4  | 10.07 | 162.49  | (P11951) Cytochrome c oxidase subunit 6C-2                       |
| CPT1B_RAT   | 11.01 | 8  | 772 | 88.2 | 8.60  | 285.58  | (Q63704) Carnitine O-palmitoyltransferase 1, muscle isoform      |
| CX6A1_RAT   | 33.33 | 2  | 111 | 12.3 | 9.32  | 96.02   | (P10818) Cytochrome c oxidase subunit 6A1, mitochondrial         |
| CX7A2_RAT   | 15.66 | 13 | 83  | 9.3  | 10.27 | 431.18  | (P35171) Cytochrome c oxidase subunit 7A2, mitochondrial         |
| CYB_RAT     | 2.37  | 3  | 380 | 43.0 | 7.99  | 104.99  | (P00159) Cytochrome b                                            |
| GRP75_RAT   | 12.22 | 10 | 679 | 73.8 | 6.30  | 385.31  | (P48721) Stress-70 protein, mitochondrial                        |
| HCD2_RAT    | 22.22 | 3  | 261 | 27.2 | 8.78  | 174.05  | (O70351) 3-hydroxyacyl-CoA dehydrogenase type-2                  |
| M2OM_RAT    | 7.96  | 2  | 314 | 34.2 | 9.88  | 106.54  | (P97700) Mitochondrial 2-oxoglutarate/malate carrier protein     |

|           |       |    |     |      |           |        |                                                                                               |
|-----------|-------|----|-----|------|-----------|--------|-----------------------------------------------------------------------------------------------|
| MCCB_RAT  | 38.90 | 16 | 563 | 61.5 | 8.31      | 786.96 | (Q5XIT9)<br>Methylcrotonoyl-CoA<br>carboxylase beta<br>chain, mitochondrial                   |
| MMSA_RAT  | 39.25 | 24 | 535 | 57.8 | 8.22      | 996.51 | (Q02253)<br>Methylmalonate-<br>semialdehyde<br>dehydrogenase<br>[acylating],<br>mitochondrial |
| PECL_RAT  | 9.72  | 2  | 391 | 43.0 | 8.98      | 87.89  | (Q5XIC0)<br>Peroxisomal 3,2-trans-<br>enoyl-CoA isomerase                                     |
| PRDX3_RAT | 39.30 | 11 | 257 | 28.3 | 7.55      | 361.53 | (Q9Z0V6)<br>Thioredoxin-<br>dependent peroxide<br>reductase,<br>mitochondrial                 |
| PRDX5_RAT | 20.66 | 3  | 213 | 22.2 | 8.66      | 94.43  | (Q9R063)<br>Peroxioredoxin-5,<br>mitochondrial                                                |
| QCR6_RAT  | 20.22 | 4  | 89  | 10.4 | 4.97      | 164.05 | (Q5M9I5)<br>Cytochrome b-c1<br>complex subunit 6,<br>mitochondrial                            |
| QCR8_RAT  | 64.63 | 16 | 82  | 9.8  | 10.5<br>2 | 413.55 | (Q7TQ16)<br>Cytochrome b-c1<br>complex subunit 8                                              |
| SAM50_RAT | 5.97  | 2  | 469 | 51.9 | 6.80      | 67.97  | (Q6AXV4) Sorting<br>and assembly<br>machinery component<br>50 homolog                         |
| SUCA_RAT  | 12.72 | 4  | 346 | 36.1 | 9.48      | 176.65 | (P13086) Succinyl-<br>CoA ligase [GDP-<br>forming] subunit<br>alpha, mitochondrial            |
| THIL_RAT  | 26.65 | 9  | 424 | 44.7 | 8.76      | 332.58 | (P17764) Acetyl-CoA                                                                           |



|          |       |     |     |      |      |          |                                                                      |
|----------|-------|-----|-----|------|------|----------|----------------------------------------------------------------------|
|          |       |     |     |      |      |          | acetyltransferase,<br>mitochondrial                                  |
| UCRI_RAT | 71.53 | 285 | 274 | 29.4 | 8.87 | 17901.66 | (P20788) Cytochrome<br>b-c1 complex subunit<br>Rieske, mitochondrial |
| IMMT_RAT | 16.42 | 8   | 609 | 67.1 | 5.80 | 246.50   | (Q3KR86)<br>Mitochondrial inner<br>membrane protein                  |
|          |       |     |     |      |      |          |                                                                      |

Supplemental Table S9. Complex 4 band chymotrypsin digestion

| Accession | Coverage | Peptides | # AAs | MW [kDa] | calc. pI | Score   | Description                                                                             |
|-----------|----------|----------|-------|----------|----------|---------|-----------------------------------------------------------------------------------------|
| IDHP_RAT  | 46.24    | 25       | 452   | 50.9     | 8.69     | 898.15  | (P56574) Isocitrate dehydrogenase [NADP], mitochondrial                                 |
| AATM_RAT  | 53.26    | 45       | 430   | 47.3     | 9.00     | 1309.63 | (P00507) Aspartate aminotransferase, mitochondrial                                      |
| IVD_RAT   | 7.31     | 3        | 424   | 46.4     | 7.90     | 141.70  | (P12007) Isovaleryl-CoA dehydrogenase, mitochondrial                                    |
| MDHM_RAT  | 39.35    | 27       | 338   | 35.7     | 8.68     | 792.33  | (P04636) Malate dehydrogenase, mitochondrial                                            |
| ECHA_RAT  | 6.16     | 4        | 763   | 82.6     | 9.06     | 152.24  | (Q64428) Trifunctional enzyme subunit alpha, mitochondrial                              |
| KCRS_RAT  | 11.46    | 3        | 419   | 47.4     | 8.51     | 131.40  | (P09605) Creatine kinase S-type, mitochondrial                                          |
| COX7B_RAT | 20.00    | 3        | 80    | 9.0      | 10.11    | 114.15  | (P80431) Cytochrome c oxidase subunit 7B, mitochondrial                                 |
| ODPA_RAT  | 15.13    | 4        | 390   | 43.2     | 8.19     | 145.71  | (P26284) Pyruvate dehydrogenase E1 component subunit alpha, somatic form, mitochondrial |
| ACON_RAT  | 24.36    | 30       | 780   | 85.4     | 7.83     | 935.87  | (Q9ER34) Aconitate hydratase, mitochondrial                                             |
| DHSA_RAT  | 27.90    | 18       | 656   | 71.6     | 7.17     | 525.36  | (Q920L2) Succinate dehydrogenase                                                        |

|           |       |    |      |       |      |         |                                                                                  |
|-----------|-------|----|------|-------|------|---------|----------------------------------------------------------------------------------|
|           |       |    |      |       |      |         | [ubiquinone] flavoprotein subunit, mitochondrial                                 |
| ETFD_RAT  | 6.82  | 3  | 616  | 68.2  | 7.56 | 67.28   | (Q6UPE1) Electron transfer flavoprotein-ubiquinone oxidoreductase, mitochondrial |
| ODO1_RAT  | 8.02  | 6  | 1023 | 116.2 | 6.77 | 197.92  | (Q5XI78) 2-oxoglutarate dehydrogenase E1 component, mitochondrial                |
| FUMH_RAT  | 19.13 | 9  | 507  | 54.4  | 8.95 | 297.91  | (P14408) Fumarate hydratase, mitochondrial                                       |
| COX5A_RAT | 53.42 | 21 | 146  | 16.1  | 6.54 | 655.00  | (P11240) Cytochrome c oxidase subunit 5A, mitochondrial                          |
| ADT1_RAT  | 37.58 | 34 | 298  | 33.0  | 9.79 | 1251.00 | (Q05962) ADP/ATP translocase 1                                                   |
| ADT2_RAT  | 40.27 | 17 | 298  | 32.9  | 9.73 | 859.29  | (Q09073) ADP/ATP translocase 2                                                   |
| CYC_MOUSE | 23.81 | 2  | 105  | 11.6  | 9.58 | 65.49   | (P62897) Cytochrome c, somatic                                                   |
| SODM_RAT  | 18.47 | 3  | 222  | 24.7  | 8.81 | 114.38  | (P07895) Superoxide dismutase [Mn], mitochondrial                                |
| VDAC1_RAT | 41.34 | 14 | 283  | 30.7  | 8.54 | 404.20  | (Q9Z2L0) Voltage-dependent anion-selective channel protein 1                     |
| VDAC2_RAT | 10.17 | 2  | 295  | 31.7  | 7.49 | 121.81  | (P81155) Voltage-dependent anion-selective channel protein 2                     |
| VDAC3_RAT | 7.42  | 2  | 283  | 30.8  | 8.70 | 97.64   | (Q9R1Z0) Voltage-dependent anion-                                                |

|               |       |    |     |      |       |         |                                                                                           |
|---------------|-------|----|-----|------|-------|---------|-------------------------------------------------------------------------------------------|
|               |       |    |     |      |       |         | selective channel protein<br>3                                                            |
| MPCP_RAT      | 10.96 | 5  | 356 | 39.4 | 9.33  | 97.04   | (P16036) Phosphate<br>carrier protein,<br>mitochondrial                                   |
| DHSB_RAT      | 9.93  | 4  | 282 | 31.8 | 8.68  | 163.63  | (P21913) Succinate<br>dehydrogenase<br>[ubiquinone] iron-sulfur<br>subunit, mitochondrial |
| ACADV_RA<br>T | 19.39 | 14 | 655 | 70.7 | 8.90  | 568.36  | (P45953) Very long-<br>chain specific acyl-CoA<br>dehydrogenase,<br>mitochondrial         |
| ALDH2_RAT     | 50.10 | 80 | 519 | 56.5 | 7.05  | 2527.89 | (P11884) Aldehyde<br>dehydrogenase,<br>mitochondrial                                      |
| AOFA_RAT      | 7.03  | 3  | 526 | 59.5 | 7.93  | 77.05   | (P21396) Amine oxidase<br>[flavin-containing] A                                           |
| CACP_RAT      | 5.11  | 2  | 626 | 70.8 | 8.54  | 73.05   | (Q704S8) Carnitine O-<br>acetyltransferase                                                |
| COX2_RAT      | 36.56 | 19 | 227 | 25.9 | 4.73  | 513.11  | (P00406) Cytochrome c<br>oxidase subunit 2                                                |
| COX41_RAT     | 40.24 | 31 | 169 | 19.5 | 9.44  | 873.41  | (P10888) Cytochrome c<br>oxidase subunit 4<br>isoform 1, mitochondrial                    |
| COX5B_RAT     | 13.18 | 6  | 129 | 13.9 | 7.78  | 285.23  | (P12075) Cytochrome c<br>oxidase subunit 5B,<br>mitochondrial                             |
| CX6C2_RAT     | 64.47 | 23 | 76  | 8.4  | 10.07 | 592.62  | (P11951) Cytochrome c<br>oxidase subunit 6C-2                                             |
| CTRB1_RAT     | 3.80  | 4  | 263 | 27.8 | 5.07  | 148.97  | (P07338)<br>Chymotrypsinogen B                                                            |
| CX6A1_RAT     | 26.13 | 6  | 111 | 12.3 | 9.32  | 257.54  | (P10818) Cytochrome c<br>oxidase subunit 6A1,<br>mitochondrial                            |

|           |       |    |     |      |       |        |                                                                               |
|-----------|-------|----|-----|------|-------|--------|-------------------------------------------------------------------------------|
| CX6A2_RAT | 52.13 | 28 | 94  | 10.5 | 9.07  | 871.36 | (P10817) Cytochrome c oxidase subunit 6A2, mitochondrial                      |
| CX7A2_RAT | 26.51 | 2  | 83  | 9.3  | 10.27 | 69.87  | (P35171) Cytochrome c oxidase subunit 7A2, mitochondrial                      |
| GRP75_RAT | 8.54  | 3  | 679 | 73.8 | 6.30  | 102.94 | (P48721) Stress-70 protein, mitochondrial                                     |
| HCD2_RAT  | 14.56 | 3  | 261 | 27.2 | 8.78  | 104.66 | (O70351) 3-hydroxyacyl-CoA dehydrogenase type-2                               |
| MMSA_RAT  | 25.23 | 13 | 535 | 57.8 | 8.22  | 536.60 | (Q02253) Methylmalonate-semialdehyde dehydrogenase [acylating], mitochondrial |
| ODPB_RAT  | 15.60 | 5  | 359 | 39.0 | 6.65  | 266.32 | (P49432) Pyruvate dehydrogenase E1 component subunit beta, mitochondrial      |
| SAM50_RAT | 2.35  | 2  | 469 | 51.9 | 6.80  | 57.50  | (Q6AXV4) Sorting and assembly machinery component 50 homolog                  |
| SSDH_RAT  | 6.12  | 3  | 523 | 56.1 | 8.09  | 117.63 | (P51650) Succinate-semialdehyde dehydrogenase, mitochondrial                  |
| SUCA_RAT  | 27.46 | 9  | 346 | 36.1 | 9.48  | 326.62 | (P13086) Succinyl-CoA ligase [GDP-forming] subunit alpha, mitochondrial       |
| THIL_RAT  | 21.70 | 15 | 424 | 44.7 | 8.76  | 563.80 | (P17764) Acetyl-CoA acetyltransferase, mitochondrial                          |
| IMMT_RAT  | 8.54  | 4  | 609 | 67.1 | 5.80  | 148.85 | (Q3KR86) Mitochondrial inner                                                  |

|  |  |  |  |  |  |  |                  |
|--|--|--|--|--|--|--|------------------|
|  |  |  |  |  |  |  | membrane protein |
|  |  |  |  |  |  |  |                  |

Supplemental Table S10. Complex 4 band trypsin digestion

| Accession | Coverage | Peptides | # AAs | MW [kDa] | calc. pI | Score   | Description                                                        |
|-----------|----------|----------|-------|----------|----------|---------|--------------------------------------------------------------------|
| ACADL_RAT | 25.81    | 9        | 430   | 47.8     | 7.74     | 383.61  | (P15650) Long-chain specific acyl-CoA dehydrogenase, mitochondrial |
| IDHP_RAT  | 52.88    | 118      | 452   | 50.9     | 8.69     | 4020.14 | (P56574) Isocitrate dehydrogenase [NADP], mitochondrial            |
| QCR2_RAT  | 14.82    | 9        | 452   | 48.4     | 9.14     | 459.35  | (P32551) Cytochrome b-c1 complex subunit 2, mitochondrial          |
| ATPA_RAT  | 16.82    | 8        | 553   | 59.7     | 9.19     | 400.14  | (P15999) ATP synthase subunit alpha, mitochondrial                 |
| CISY_RAT  | 22.96    | 15       | 466   | 51.8     | 8.35     | 592.84  | (Q8VHF5) Citrate synthase, mitochondrial                           |
| AATM_RAT  | 66.51    | 191      | 430   | 47.3     | 9.00     | 7425.02 | (P00507) Aspartate aminotransferase, mitochondrial                 |
| IVD_RAT   | 20.52    | 10       | 424   | 46.4     | 7.90     | 460.20  | (P12007) Isovaleryl-CoA dehydrogenase, mitochondrial               |
| MDHM_RAT  | 55.03    | 72       | 338   | 35.7     | 8.68     | 3717.71 | (P04636) Malate dehydrogenase, mitochondrial                       |
| TRY1_RAT  | 8.13     | 9        | 246   | 25.9     | 4.89     | 307.23  | (P00762) RecName: Full=Anionic trypsin-1;                          |
| ECHA_RAT  | 32.11    | 22       | 763   | 82.6     | 9.06     | 954.36  | (Q64428) Trifunctional enzyme subunit alpha, mitochondrial         |
| THIM_RAT  | 32.24    | 11       | 397   | 41.8     | 7.94     | 451.98  | (P13437) 3-ketoacyl-CoA                                            |

|           |       |    |      |       |      |         |                                                                                                                   |
|-----------|-------|----|------|-------|------|---------|-------------------------------------------------------------------------------------------------------------------|
|           |       |    |      |       |      |         | thiolase, mitochondrial                                                                                           |
| KCRS_RAT  | 28.16 | 11 | 419  | 47.4  | 8.51 | 523.22  | (P09605) Creatine kinase S-type, mitochondrial                                                                    |
| ODPA_RAT  | 42.31 | 18 | 390  | 43.2  | 8.19 | 610.40  | (P26284) Pyruvate dehydrogenase E1 component subunit alpha, somatic form, mitochondrial                           |
| ECHB_RAT  | 32.21 | 15 | 475  | 51.4  | 9.47 | 570.66  | (Q60587) Trifunctional enzyme subunit beta, mitochondrial                                                         |
| K2C6A_RAT | 3.99  | 4  | 552  | 59.2  | 7.94 | 183.43  | (Q4FZU2) Keratin, type II cytoskeletal 6A                                                                         |
| LPPRC_RAT | 1.72  | 2  | 1392 | 156.6 | 6.61 | 71.65   | (Q5SGE0) Leucine-rich PPR motif-containing protein, mitochondrial                                                 |
| K2C1_RAT  | 3.68  | 2  | 625  | 64.8  | 7.87 | 106.84  | (Q6IMF3) Keratin, type II cytoskeletal 1                                                                          |
| ACON_RAT  | 54.36 | 93 | 780  | 85.4  | 7.83 | 3613.32 | (Q9ER34) Aconitate hydratase, mitochondrial                                                                       |
| DHSA_RAT  | 47.26 | 79 | 656  | 71.6  | 7.17 | 2856.69 | (Q920L2) Succinate dehydrogenase [ubiquinone] flavoprotein subunit, mitochondrial                                 |
| ODP2_RAT  | 11.23 | 8  | 632  | 67.1  | 8.53 | 323.05  | (P08461) Dihydrolipoyllysine-residue acetyltransferase component of pyruvate dehydrogenase complex, mitochondrial |
| ACSL1_RAT | 30.90 | 33 | 699  | 78.1  | 6.99 | 1340.93 | (P18163) Long-chain-fatty-acid--CoA ligase 1                                                                      |
| ETFD_RAT  | 22.73 | 15 | 616  | 68.2  | 7.56 | 558.16  | (Q6UPE1) Electron transfer flavoprotein-ubiquinone oxidoreductase,                                                |



|            |       |     |      |       |       |          |                                                                   |
|------------|-------|-----|------|-------|-------|----------|-------------------------------------------------------------------|
|            |       |     |      |       |       |          | mitochondrial                                                     |
| ODO1_RAT   | 36.27 | 47  | 1023 | 116.2 | 6.77  | 1682.99  | (Q5XI78) 2-oxoglutarate dehydrogenase E1 component, mitochondrial |
| FUMH_RAT   | 55.03 | 72  | 507  | 54.4  | 8.95  | 2905.28  | (P14408) Fumarate hydratase, mitochondrial                        |
| CH60_MOUSE | 8.55  | 2   | 573  | 60.9  | 6.18  | 130.12   | (P63038) 60 kDa heat shock protein, mitochondrial                 |
| COX5A_RAT  | 48.63 | 43  | 146  | 16.1  | 6.54  | 1602.66  | (P11240) Cytochrome c oxidase subunit 5A, mitochondrial           |
| ATPB_RAT   | 33.46 | 18  | 529  | 56.3  | 5.34  | 664.32   | (P10719) ATP synthase subunit beta, mitochondrial                 |
| ADT1_RAT   | 61.41 | 251 | 298  | 33.0  | 9.79  | 12021.61 | (Q05962) ADP/ATP translocase 1                                    |
| ADT2_RAT   | 36.58 | 158 | 298  | 32.9  | 9.73  | 8205.75  | (Q09073) ADP/ATP translocase 2                                    |
| DCMC_RAT   | 33.13 | 18  | 492  | 54.7  | 8.72  | 779.00   | (Q920F5) Malonyl-CoA decarboxylase, mitochondrial                 |
| CYC_MOUSE  | 25.71 | 2   | 105  | 11.6  | 9.58  | 115.82   | (P62897) Cytochrome c, somatic                                    |
| BR44_RAT   | 44.09 | 7   | 127  | 14.2  | 10.48 | 245.88   | (P38718) Brain protein 44                                         |
| SODM_RAT   | 68.92 | 35  | 222  | 24.7  | 8.81  | 1785.42  | (P07895) Superoxide dismutase [Mn], mitochondrial                 |
| DHE3_RAT   | 9.86  | 4   | 558  | 61.4  | 8.00  | 127.39   | (P10860) Glutamate dehydrogenase 1, mitochondrial                 |
| AL9A1_RAT  | 19.23 | 11  | 494  | 53.6  | 6.92  | 488.30   | (Q9JLJ3) 4-trimethylaminobutyraldehyde dehydrogenase              |

|           |       |     |     |      |      |         |                                                                                  |
|-----------|-------|-----|-----|------|------|---------|----------------------------------------------------------------------------------|
| VDAC1_RAT | 35.69 | 23  | 283 | 30.7 | 8.54 | 1181.75 | (Q9Z2L0) Voltage-dependent anion-selective channel protein 1                     |
| VDAC2_RAT | 26.44 | 8   | 295 | 31.7 | 7.49 | 325.06  | (P81155) Voltage-dependent anion-selective channel protein 2                     |
| VDAC3_RAT | 29.33 | 11  | 283 | 30.8 | 8.70 | 384.02  | (Q9R1Z0) Voltage-dependent anion-selective channel protein 3                     |
| MPCP_RAT  | 21.63 | 22  | 356 | 39.4 | 9.33 | 708.20  | (P16036) Phosphate carrier protein, mitochondrial                                |
| DHSB_RAT  | 19.15 | 9   | 282 | 31.8 | 8.68 | 336.78  | (P21913) Succinate dehydrogenase [ubiquinone] iron-sulfur subunit, mitochondrial |
| ABCB7_RAT | 5.98  | 2   | 752 | 82.5 | 9.31 | 110.28  | (Q704E8) ATP-binding cassette sub-family B member 7, mitochondrial               |
| HCDH_RAT  | 36.31 | 10  | 314 | 34.4 | 8.76 | 527.88  | (Q9WVK7) Hydroxyacyl-coenzyme A dehydrogenase, mitochondrial                     |
| ACADV_RAT | 53.74 | 130 | 655 | 70.7 | 8.90 | 6270.29 | (P45953) Very long-chain specific acyl-CoA dehydrogenase, mitochondrial          |
| ALDH2_RAT | 57.03 | 169 | 519 | 56.5 | 7.05 | 7389.90 | (P11884) Aldehyde dehydrogenase, mitochondrial                                   |
| AOFA_RAT  | 22.24 | 11  | 526 | 59.5 | 7.93 | 430.31  | (P21396) Amine oxidase [flavin-containing] A                                     |
| AT1B1_RAT | 8.88  | 2   | 304 | 35.2 | 8.65 | 59.89   | (P07340) Sodium/potassium-transporting ATPase subunit beta-1                     |

|             |       |    |     |      |           |         |                                                                  |
|-------------|-------|----|-----|------|-----------|---------|------------------------------------------------------------------|
| ATPO_RAT    | 15.49 | 3  | 213 | 23.4 | 10.0<br>2 | 100.54  | (Q06647) ATP synthase subunit O, mitochondrial                   |
| BDH_RAT     | 18.95 | 4  | 343 | 38.2 | 8.84      | 267.63  | (P29147) D-beta-hydroxybutyrate dehydrogenase, mitochondrial     |
| BR44L_MOUSE | 43.12 | 5  | 109 | 12.4 | 9.61      | 255.58  | (P63030) Brain protein 44-like protein                           |
| CACP_RAT    | 19.49 | 10 | 626 | 70.8 | 8.54      | 368.80  | (Q704S8) Carnitine O-acetyltransferase                           |
| CISD1_RAT   | 23.15 | 3  | 108 | 12.1 | 8.84      | 193.28  | (B0K020) CDGSH iron sulfur domain-containing protein 1           |
| COX1_RAT    | 9.14  | 7  | 514 | 56.9 | 6.80      | 400.23  | (P05503) Cytochrome c oxidase subunit 1                          |
| COX2_RAT    | 33.04 | 52 | 227 | 25.9 | 4.73      | 1740.63 | (P00406) Cytochrome c oxidase subunit 2                          |
| COX41_RAT   | 34.91 | 61 | 169 | 19.5 | 9.44      | 1927.01 | (P10888) Cytochrome c oxidase subunit 4 isoform 1, mitochondrial |
| COX5B_RAT   | 40.31 | 46 | 129 | 13.9 | 7.78      | 1601.34 | (P12075) Cytochrome c oxidase subunit 5B, mitochondrial          |
| CX6C2_RAT   | 31.58 | 25 | 76  | 8.4  | 10.0<br>7 | 822.97  | (P11951) Cytochrome c oxidase subunit 6C-2                       |
| COX8B_RAT   | 50.00 | 4  | 70  | 7.5  | 10.3<br>7 | 200.12  | (P16221) Cytochrome c oxidase subunit 8B, mitochondrial          |
| CPT1B_RAT   | 21.89 | 23 | 772 | 88.2 | 8.60      | 865.79  | (Q63704) Carnitine O-palmitoyltransferase 1, muscle isoform      |
| CPT2_RAT    | 16.11 | 10 | 658 | 74.1 | 7.33      | 530.19  | (P18886) Carnitine O-palmitoyltransferase 2, mitochondrial       |

|           |       |    |     |      |       |         |                                                                     |
|-----------|-------|----|-----|------|-------|---------|---------------------------------------------------------------------|
| CX6A1_RAT | 45.05 | 5  | 111 | 12.3 | 9.32  | 166.73  | (P10818) Cytochrome c oxidase subunit 6A1, mitochondrial            |
| CX6A2_RAT | 30.85 | 6  | 94  | 10.5 | 9.07  | 127.87  | (P10817) Cytochrome c oxidase subunit 6A2, mitochondrial            |
| CX7A2_RAT | 18.07 | 21 | 83  | 9.3  | 10.27 | 656.56  | (P35171) Cytochrome c oxidase subunit 7A2, mitochondrial            |
| D3D2_RAT  | 17.30 | 4  | 289 | 32.2 | 9.54  | 230.11  | (P23965) 3,2-trans-enoyl-CoA isomerase, mitochondrial               |
| DECR_RAT  | 16.42 | 7  | 335 | 36.1 | 8.94  | 241.24  | (Q64591) 2,4-dienoyl-CoA reductase, mitochondrial                   |
| ECH1_RAT  | 32.11 | 15 | 327 | 36.1 | 7.99  | 692.29  | (Q62651) Delta(3,5)-Delta(2,4)-dienoyl-CoA isomerase, mitochondrial |
| ECHM_RAT  | 10.34 | 3  | 290 | 31.5 | 8.13  | 174.94  | (P14604) Enoyl-CoA hydratase, mitochondrial                         |
| ES1_RAT   | 19.17 | 2  | 266 | 28.2 | 8.92  | 56.45   | (P56571) ES1 protein homolog, mitochondrial                         |
| GRP75_RAT | 17.53 | 15 | 679 | 73.8 | 6.30  | 663.44  | (P48721) Stress-70 protein, mitochondrial                           |
| HCD2_RAT  | 58.24 | 21 | 261 | 27.2 | 8.78  | 805.18  | (O70351) 3-hydroxyacyl-CoA dehydrogenase type-2                     |
| HIG1A_RAT | 33.33 | 3  | 93  | 10.3 | 9.99  | 155.36  | (Q8VH49) HIG1 domain family member 1A                               |
| HSDL2_RAT | 14.31 | 20 | 524 | 58.3 | 6.19  | 1078.26 | (Q4V8F9) Hydroxysteroid dehydrogenase-like protein 2                |
| M2OM_RAT  | 31.21 | 14 | 314 | 34.2 | 9.88  | 632.35  | (P97700) Mitochondrial 2-oxoglutarate/malate carrier protein        |
| MCAT_RAT  | 8.97  | 4  | 301 | 33.1 | 9.48  | 195.77  | (P97521) Mitochondrial carnitine/acylcarnitine                      |

|           |       |    |     |      |      |         |                                                                                   |
|-----------|-------|----|-----|------|------|---------|-----------------------------------------------------------------------------------|
|           |       |    |     |      |      |         | carrier protein                                                                   |
| MMSA_RAT  | 56.07 | 55 | 535 | 57.8 | 8.22 | 2426.00 | (Q02253) Methylmalonate-semialdehyde dehydrogenase [acylating], mitochondrial     |
| NB5R3_RAT | 13.95 | 5  | 301 | 34.2 | 8.38 | 211.93  | (P20070) NADH-cytochrome b5 reductase 3                                           |
| ODBA_RAT  | 14.97 | 4  | 441 | 50.1 | 7.83 | 204.55  | (P11960) 2-oxoisovalerate dehydrogenase subunit alpha, mitochondrial              |
| ODPB_RAT  | 51.25 | 29 | 359 | 39.0 | 6.65 | 1168.27 | (P49432) Pyruvate dehydrogenase E1 component subunit beta, mitochondrial          |
| PECL_RAT  | 6.65  | 2  | 391 | 43.0 | 8.98 | 69.43   | (Q5XIC0) Peroxisomal 3,2-trans-enoyl-CoA isomerase                                |
| PRDX3_RAT | 20.62 | 3  | 257 | 28.3 | 7.55 | 91.29   | (Q9Z0V6) Thioredoxin-dependent peroxide reductase, mitochondrial                  |
| PRDX5_RAT | 33.80 | 7  | 213 | 22.2 | 8.66 | 344.98  | (Q9R063) Peroxiredoxin-5, mitochondrial                                           |
| PYRD2_RAT | 12.56 | 3  | 581 | 62.8 | 8.18 | 105.75  | (Q68FT3) Pyridine nucleotide-disulfide oxidoreductase domain-containing protein 2 |
| SAM50_RAT | 30.28 | 16 | 469 | 51.9 | 6.80 | 505.46  | (Q6AXV4) Sorting and assembly machinery component 50 homolog                      |
| SCPDH_RAT | 10.96 | 2  | 429 | 47.1 | 8.84 | 121.68  | (Q6AY30) Probable saccharopine dehydrogenase                                      |
| SSDH_RAT  | 16.63 | 6  | 523 | 56.1 | 8.09 | 303.40  | (P51650) Succinate-semialdehyde dehydrogenase, mitochondrial                      |

|           |       |    |     |      |      |         |                                                                         |
|-----------|-------|----|-----|------|------|---------|-------------------------------------------------------------------------|
| SUCA_RAT  | 27.46 | 10 | 346 | 36.1 | 9.48 | 415.32  | (P13086) Succinyl-CoA ligase [GDP-forming] subunit alpha, mitochondrial |
| THIL_RAT  | 39.86 | 22 | 424 | 44.7 | 8.76 | 1187.83 | (P17764) Acetyl-CoA acetyltransferase, mitochondrial                    |
| TOM40_RAT | 11.91 | 2  | 361 | 37.9 | 8.35 | 157.21  | (Q75Q40) Mitochondrial import receptor subunit TOM40 homolog            |
| IMMT_RAT  | 30.54 | 25 | 609 | 67.1 | 5.80 | 922.67  | (Q3KR86) Mitochondrial inner membrane protein                           |
|           |       |    |     |      |      |         |                                                                         |

Supplemental Table S11. Complex V band trypsin digestion

| Accession | Coverage | Peptides | # AAs | MW [kDa] | calc. pI | Score    | Description                                                |
|-----------|----------|----------|-------|----------|----------|----------|------------------------------------------------------------|
| IDHP_RAT  | 13.94    | 7        | 452   | 50.9     | 8.69     | 231.61   | (P56574) Isocitrate dehydrogenase [NADP], mitochondrial    |
| QCR2_RAT  | 40.49    | 32       | 452   | 48.4     | 9.14     | 1332.91  | (P32551) Cytochrome b-c1 complex subunit 2, mitochondrial  |
| ATPA_RAT  | 59.49    | 967      | 553   | 59.7     | 9.19     | 46073.48 | (P15999) ATP synthase subunit alpha, mitochondrial         |
| CISY_RAT  | 8.37     | 3        | 466   | 51.8     | 8.35     | 87.09    | (Q8VHF5) Citrate synthase, mitochondrial                   |
| AATM_RAT  | 34.65    | 19       | 430   | 47.3     | 9.00     | 618.51   | (P00507) Aspartate aminotransferase, mitochondrial         |
| MDHM_RAT  | 46.45    | 22       | 338   | 35.7     | 8.68     | 1006.00  | (P04636) Malate dehydrogenase, mitochondrial               |
| TRY1_RAT  | 8.13     | 4        | 246   | 25.9     | 4.89     | 141.97   | (P00762) RecName: Full=Anionic trypsin-1;                  |
| ECHA_RAT  | 48.75    | 64       | 763   | 82.6     | 9.06     | 2760.69  | (Q64428) Trifunctional enzyme subunit alpha, mitochondrial |
| KCRS_RAT  | 47.97    | 190      | 419   | 47.4     | 8.51     | 7100.46  | (P09605) Creatine kinase S-type, mitochondrial             |
| ECHB_RAT  | 50.95    | 48       | 475   | 51.4     | 9.47     | 1790.61  | (Q60587) Trifunctional enzyme subunit beta, mitochondrial  |
| ATPG_RAT  | 34.07    | 108      | 273   | 30.2     | 8.84     | 3892.13  | (P35435) ATP synthase subunit gamma,                       |

|           |       |      |     |      |       |          |                                                              |
|-----------|-------|------|-----|------|-------|----------|--------------------------------------------------------------|
|           |       |      |     |      |       |          | mitochondrial                                                |
| ACON_RAT  | 17.44 | 13   | 780 | 85.4 | 7.83  | 433.26   | (Q9ER34) Aconitate hydratase, mitochondrial                  |
| QCR1_RAT  | 37.08 | 29   | 480 | 52.8 | 5.88  | 1050.02  | (Q68FY0) Cytochrome b-c1 complex subunit 1, mitochondrial    |
| FUMH_RAT  | 7.50  | 2    | 507 | 54.4 | 8.95  | 163.72   | (P14408) Fumarate hydratase, mitochondrial                   |
| COX5A_RAT | 42.47 | 9    | 146 | 16.1 | 6.54  | 322.22   | (P11240) Cytochrome c oxidase subunit 5A, mitochondrial      |
| ATPB_RAT  | 79.58 | 1290 | 529 | 56.3 | 5.34  | 49550.09 | (P10719) ATP synthase subunit beta, mitochondrial            |
| ADT1_RAT  | 47.65 | 41   | 298 | 33.0 | 9.79  | 1608.97  | (Q05962) ADP/ATP translocase 1                               |
| ADT2_RAT  | 27.85 | 19   | 298 | 32.9 | 9.73  | 761.97   | (Q09073) ADP/ATP translocase 2                               |
| BR44_RAT  | 22.83 | 3    | 127 | 14.2 | 10.48 | 71.50    | (P38718) Brain protein 44                                    |
| SODM_RAT  | 6.31  | 2    | 222 | 24.7 | 8.81  | 66.65    | (P07895) Superoxide dismutase [Mn], mitochondrial            |
| VDAC1_RAT | 40.99 | 18   | 283 | 30.7 | 8.54  | 605.87   | (Q9Z2L0) Voltage-dependent anion-selective channel protein 1 |
| VDAC2_RAT | 46.44 | 14   | 295 | 31.7 | 7.49  | 510.29   | (P81155) Voltage-dependent anion-selective channel protein 2 |
| VDAC3_RAT | 27.56 | 9    | 283 | 30.8 | 8.70  | 314.35   | (Q9R1Z0) Voltage-dependent anion-                            |



|             |       |     |     |      |       |         |                                                                         |
|-------------|-------|-----|-----|------|-------|---------|-------------------------------------------------------------------------|
|             |       |     |     |      |       |         | selective channel protein 3                                             |
| MPCP_RAT    | 18.54 | 12  | 356 | 39.4 | 9.33  | 480.20  | (P16036) Phosphate carrier protein, mitochondrial                       |
| ACADV_RAT   | 25.34 | 17  | 655 | 70.7 | 8.90  | 889.11  | (P45953) Very long-chain specific acyl-CoA dehydrogenase, mitochondrial |
| AT5F1_RAT   | 37.50 | 120 | 256 | 28.9 | 9.36  | 4763.73 | (P19511) ATP synthase subunit b, mitochondrial                          |
| AT5G1_RAT   | 22.79 | 23  | 136 | 14.2 | 9.91  | 974.33  | (Q06645) ATP synthase lipid-binding protein, mitochondrial              |
| ATP5H_RAT   | 72.05 | 64  | 161 | 18.8 | 6.60  | 1612.06 | (P31399) ATP synthase subunit d, mitochondrial                          |
| ATP5I_RAT   | 56.34 | 21  | 71  | 8.2  | 9.35  | 706.66  | (P29419) ATP synthase subunit e, mitochondrial                          |
| ATP5J_RAT   | 43.52 | 2   | 108 | 12.5 | 9.44  | 56.42   | (P21571) ATP synthase-coupling factor 6, mitochondrial                  |
| ATP6_RAT    | 4.42  | 2   | 226 | 25.0 | 9.60  | 87.98   | (P05504) ATP synthase subunit a                                         |
| ATP8_RAT    | 34.33 | 12  | 67  | 7.6  | 9.32  | 361.71  | (P11608) ATP synthase protein 8                                         |
| ATPO_RAT    | 59.15 | 89  | 213 | 23.4 | 10.02 | 3684.73 | (Q06647) ATP synthase subunit O, mitochondrial                          |
| BR44L_MOUSE | 43.12 | 5   | 109 | 12.4 | 9.61  | 225.04  | (P63030) Brain protein 44-like protein                                  |
| COX1_RAT    | 8.95  | 2   | 514 | 56.9 | 6.80  | 102.09  | (P05503) Cytochrome c oxidase subunit 1                                 |
| COX2_RAT    | 28.63 | 10  | 227 | 25.9 | 4.73  | 360.88  | (P00406) Cytochrome c oxidase subunit 2                                 |

|           |       |    |     |      |       |        |                                                                               |
|-----------|-------|----|-----|------|-------|--------|-------------------------------------------------------------------------------|
| COX41_RAT | 27.22 | 20 | 169 | 19.5 | 9.44  | 497.87 | (P10888) Cytochrome c oxidase subunit 4 isoform 1, mitochondrial              |
| CX6C2_RAT | 31.58 | 6  | 76  | 8.4  | 10.07 | 188.88 | (P11951) Cytochrome c oxidase subunit 6C-2                                    |
| CPT1B_RAT | 15.54 | 11 | 772 | 88.2 | 8.60  | 272.89 | (Q63704) Carnitine O-palmitoyltransferase 1, muscle isoform                   |
| CX7A2_RAT | 15.66 | 3  | 83  | 9.3  | 10.27 | 161.21 | (P35171) Cytochrome c oxidase subunit 7A2, mitochondrial                      |
| GRP75_RAT | 6.63  | 3  | 679 | 73.8 | 6.30  | 123.05 | (P48721) Stress-70 protein, mitochondrial                                     |
| HSDL2_RAT | 5.92  | 2  | 524 | 58.3 | 6.19  | 84.44  | (Q4V8F9) Hydroxysteroid dehydrogenase-like protein 2                          |
| M2OM_RAT  | 8.92  | 2  | 314 | 34.2 | 9.88  | 91.87  | (P97700) Mitochondrial 2-oxoglutarate/malate carrier protein                  |
| MCCB_RAT  | 17.94 | 9  | 563 | 61.5 | 8.31  | 502.85 | (Q5XIT9) Methylcrotonoyl-CoA carboxylase beta chain, mitochondrial            |
| MMSA_RAT  | 35.14 | 19 | 535 | 57.8 | 8.22  | 654.75 | (Q02253) Methylmalonate-semialdehyde dehydrogenase [acylating], mitochondrial |
| NU4M_RAT  | 8.28  | 2  | 459 | 51.8 | 9.41  | 71.78  | (P05508) NADH-ubiquinone oxidoreductase chain 4                               |
| PRDX3_RAT | 16.34 | 2  | 257 | 28.3 | 7.55  | 70.73  | (Q9Z0V6) Thioredoxin-independent peroxide reductase,                          |

|           |       |    |     |      |           |        |                                                                         |
|-----------|-------|----|-----|------|-----------|--------|-------------------------------------------------------------------------|
|           |       |    |     |      |           |        | mitochondrial                                                           |
| QCR8_RAT  | 15.85 | 5  | 82  | 9.8  | 10.5<br>2 | 210.19 | (Q7TQ16) Cytochrome b-c1 complex subunit 8                              |
| SAM50_RAT | 11.09 | 6  | 469 | 51.9 | 6.80      | 237.54 | (Q6AXV4) Sorting and assembly machinery component 50 homolog            |
| SUCA_RAT  | 13.01 | 4  | 346 | 36.1 | 9.48      | 221.68 | (P13086) Succinyl-CoA ligase [GDP-forming] subunit alpha, mitochondrial |
| THIL_RAT  | 4.01  | 2  | 424 | 44.7 | 8.76      | 97.74  | (P17764) Acetyl-CoA acetyltransferase, mitochondrial                    |
| UCRI_RAT  | 25.18 | 5  | 274 | 29.4 | 8.87      | 373.17 | (P20788) Cytochrome b-c1 complex subunit Rieske, mitochondrial          |
| USMG5_RAT | 44.83 | 10 | 58  | 6.4  | 9.83      | 366.74 | (Q9JJW3) Up-regulated during skeletal muscle growth protein 5           |
| IMMT_RAT  | 10.51 | 4  | 609 | 67.1 | 5.80      | 99.44  | (Q3KR86) Mitochondrial inner membrane protein                           |
| DHRS4_RAT | 6.09  | 2  | 279 | 29.8 | 9.55      | 45.19  | (Q8VID1) Dehydrogenase/reductase SDR family member 4                    |
|           |       |    |     |      |           |        |                                                                         |



**Supplemental Figure S8.** Complex V activity assay, showing that the enzyme hydrolyzes ATP (A) and GTP (B) with essentially the same affinity. Thus, incubating 2D BN-PAGE gels with ATP or GTP, generates free phosphate and ADP or GDP.

**A. ATP**

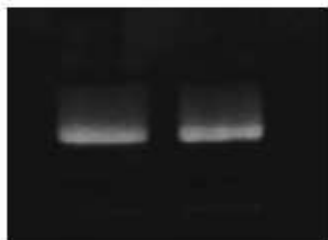

**B. GTP**

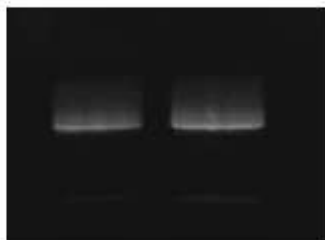

Supplement: NIHMS424528-supplement-1_si_001.pdf [file NIHMS424528-supplement-1_si_001.pdf]
